# Supplementary material
Source: PubMed Central journal article supplement (PMC2908261)
Supplement: NIHMS212630-supplement-supplement_1.pdf [file NIHMS212630-supplement-supplement_1.pdf]

## Supplementary Patients and Methods

### Study Cohort and Study Sample

The Pulmonary Vascular Complications of Liver Disease (PVCLD) Study enrolled a cohort of 536 patients evaluated for liver transplantation at 7 centers in the United States between 2003 and 2006. The only inclusion criterion was the presence of chronic portal hypertension with or without intrinsic liver disease. We excluded patients with evidence of active infection, recent (<2 weeks) gastrointestinal bleeding, or who had undergone liver or lung transplantation. The institutional review boards at each of the participating centers approved this study, and informed consent was obtained from the patients.

We performed a case-control study. The study sample included new patients from the PVCLD Study cohort evaluated with contrast transthoracic echocardiography, spirometry, and arterial blood gas sampling (routinely performed for pretransplantation evaluation) during the study period. We excluded patients with pulmonary function testing showing a significant obstructive ventilatory defect ( $n = 30$ ), defined as forced expiratory volume in 1 second (FEV1)/forced vital capacity (FVC) <0.70 with FEV1 percent predicted <80% or a significant restrictive ventilatory defect ( $n = 18$ ), defined as FVC percent predicted and (if performed) total lung capacity percent predicted <70%. We also excluded patients with intracardiac shunting ( $n = 15$ , defined below). Patients without genetic material ( $n = 33$ ) were also excluded from this analysis.

### Case and Control Definitions

Cases and controls were identified from those patients fulfilling the inclusion and exclusion criteria defined above. Hepatopulmonary syndrome (HPS) was defined by (1) contrast echocardiography with late appearance of microbubbles after venous injection of agitated saline and (2) an alveolar-arterial oxygen gradient  $\geq 15$  mm Hg (or  $\geq 20$  mm Hg if age > 64 years), as recommended by the European Respiratory Society Task Force Pulmonary-Hepatic Vascular Disorders Scientific Committee.<sup>1</sup> Patients who did not meet both criteria were considered in the “non-HPS” group (controls). Patients with either “early” or indeterminate timing of the appearance of microbubbles in the left heart after agitated saline injection were excluded from the study.

### Clinical Variables

Patients underwent physical examination and laboratory assessment. Data were collected from the patients and from the medical record. The etiology of underlying liver disease (or portal vein thrombosis), past medical history, current medications, social history, and New York Heart Association functional class were recorded. The Model for End-Stage Liver Disease score was calculated, without inclusion of exception points for either hepatocellular carcinoma or hepatopulmonary syndrome.<sup>2</sup>

Chest radiography was interpreted locally at each center. Pulmonary function test results are expressed using sex- and race-specific prediction equations, where appropriate.<sup>3-5</sup>

### Echocardiography

Contrast transthoracic echocardiography was interpreted at each center. Agitated saline was injected via a peripheral vein during imaging. Appearance of microbubbles in the left heart  $\geq 3$  cardiac cycles after saline injection was considered “late,” consistent with intrapulmonary shunting. Appearance of microbubbles in the left heart <3 cardiac cycles after injection was considered “early,” consistent with intracardiac shunting.

### Blood Sampling

Phlebotomy was performed, and blood was collected into EDTA-containing tubes. Samples were centrifuged immediately at 2500g for 15 minutes at room temperature. Plasma and buffy coat layers were stored at  $-80^{\circ}\text{C}$ .

### Candidate Genes and Single Nucleotide Polymorphism Selection

Ninety-four genes affecting vascular homeostasis and disease were selected by the investigators (Table 1). We selected genes linked to vascular tone and cellular growth regulation, as well as genes coding for key mediators of inflammatory and coagulation cascades. We prioritized those genes previously implicated in human or animal models of pulmonary vascular disease. We also included genes with prior associations with systemic blood pressure regulation and cardiovascular disease. Candidate genes were assigned to functional categories based upon their relationship as defined by Gene Ontology Pathways.<sup>6</sup> For this study, each candidate gene was defined as a genomic region containing Introns, exons, and proximal and distal regulatory regions (coding region  $\pm \sim 5$  kilobases).

Within each candidate region, haplotype block structure was defined using data from the HapMap data release number 20/phase 2 January 2006 (National Center for Biotechnology Information B35 assembly). Single nucleotide polymorphisms (SNPs) with a minor allele frequency of  $\geq 0.05$  were selected using the following criteria: (1) minimum of one haplotype tagging SNP per block (Haploview 4.0,  $r^2 > 0.8$ ), (2) nonsynonymous substitution, or (3) a prior published association with cardiovascular phenotype.

For this study, 1086 SNPs in the 94 candidate genes were genotyped. These SNPs were distributed as follows: 79 coding (47 nonsynonymous), 753 intronic, and 254 in untranslated regions (Supplementary Table 1).

### Detection of Population Substructure and Stratification

To detect potential population substructure and stratification, we genotyped an additional set of 61 SNPs

AQ: 36

AQ: 37

AQ: 38

(null loci). Null loci were selected from a validated list of Ancestry Informative Markers<sup>7</sup> using the following criteria: (1) minor allele frequency  $\geq 0.10$ , (2) minimum of 20 megabase between loci, and (3) no linkage ( $r^2 < 0.2$ ) between null and candidate loci. The physical and genetic map positions of the null loci are available from the authors by request.

### Genotyping

Genomic DNA was isolated from peripheral leukocytes using standard procedures (Gentra Puregene; Qiagen, Valencia, CA). SNP genotyping was performed using the GoldenGate Assay (Illumina, Inc., San Diego, CA).

### Quality Control Data

Three SNPs (0.3%) were unable to be genotyped in  $\geq 15\%$  of subjects. These 3 SNPs were not included in the analysis. Seven replicate DNA samples showed 100% reproducibility of genotypes.

### Statistical Analysis

Continuous data were summarized using mean  $\pm$  standard deviation or median (interquartile range), as appropriate. Categorical variables were summarized using number and percentage. To test for differences in covariates between cases and controls, Student *t* tests, Wilcoxon rank-sum tests,  $\chi^2$  tests, and Fisher exact tests were used, as appropriate.

Genotype distributions were tested for consistency with expected Hardy-Weinberg equilibrium proportions in controls. Single locus association analyses were assessed assuming an additive genetic model using multivariable logistic regression, with adjustment for race and smoking (previously associated with case status<sup>8</sup>). The association of genotype with case/control status was expressed with odds ratios (ORs). Potential population stratification within our sample was tested using multidimensional scaling using Ancestry Informative Markers.<sup>9</sup> These analyses were performed in PLINK v1.02 (<http://pngu.mgh.harvard.edu/purcell/plink/>).<sup>10</sup>

For genes in which more than one SNP was associated with HPS, we identified linkage disequilibrium blocks containing 3 or more SNPs using Haploview 4.0.<sup>11</sup> Pairwise measures of linkage disequilibrium are displayed in [Supplementary Table 2](#). We used an expectation-maximization algorithm to estimate haplotypes. Association between disease status and haplotypes was assessed using a generalized linear model approach via the R package Haplo.stats.<sup>12</sup> Both global tests of haplotype association and haplotype-specific analysis (providing ORs with respect to a referent haplotype) were conducted.

Principal Component (PC) regression analysis was used to synthesize information across several SNPs within a gene in a gene-based approach.<sup>13,14</sup> Each SNP was assigned a score based on the per-allele model, and

PCs were constructed to be linear combinations of these scores. We used the PCs in a logistic regression model to investigate the association between each gene and case status. For each gene, we calculated PCs using the pcreg procedure in R.<sup>15</sup>

In a second gene-based approach, we used classification and regression trees (CART) to help select a small initial subset of interesting markers with high probability for further investigation.<sup>16</sup> In the CART analysis, we specified a minimum group size of 7 and minimum splitting size of 20 in R. Furthermore, we conducted a Random Forests analysis, which creates an ensemble of CART trees using random two thirds of samples of the data then tests the tree with the remaining one third of the data.<sup>17</sup> Missing data were replaced using the multiple imputation algorithm and the Random Forests algorithm.

There was 80% power to detect ORs of  $\geq 1.91$ – $3.92$  (or  $\leq 0.26$ – $0.52$ ), depending on the minor allele frequency of the SNP (0.05–0.45). Power analysis was performed using QUANTO 1.2.<sup>18</sup> Because the main goal of this study was hypothesis generation, adjustment for multiple comparisons was not performed.  $P < .05$  was considered significant for all analyses.

### Association Testing for Loci on the X Chromosome

The genes coding for NADPH oxidase 1 (NOX1), cytochrome b-245 (CYBB), and thromboplastin (HEMB) are located on the X chromosome. For the SNPs in these genes, we employed the methods described by Zheng et al,<sup>19</sup> which include the following:

1. Test for Hardy-Weinberg equilibrium using exact tests in female controls.
2. Allele-based  $\chi^2$  test for males.
3. Genotype-based tests of trend using additive genetic models for females.

For all tests,  $P < .05$  was considered significant.

### References

1. Rodriguez-Roisin R, et al. Pulmonary-hepatic vascular disorders (PHD). *Eur Respir J* 2004;24:861–880.
2. Lazaridis KN, et al. Hepatic hydrothorax: pathogenesis, diagnosis, and management. *Am J Med* 1999;107:262–267.
3. Crapo RO, Morris AH. Standardized single breath normal values for carbon monoxide diffusing capacity. *Am Rev Respir Dis* 1981; 123:185–189.
4. Crapo RO, et al. Lung volumes in healthy nonsmoking adults. *Bull Eur Physiopathol Respir* 1982;18:419–425.
5. Hankinson JL, Odencrantz JR, Fedan KB. Spirometric reference values from a sample of the general US population. *Am J Respir Crit Care Med* 1999;159:179–187.
6. Ashburner M, et al. Gene ontology: tool for the unification of biology. The Gene Ontology Consortium. *Nat Genet* 2000;25:25–29.
7. Seldin MF, et al. European population substructure: clustering of northern and southern populations. *PLoS Genet* 2006;2:e143.
8. Fallon MB, et al. Impact of hepatopulmonary syndrome on quality of life and survival in liver transplant candidates. *Gastroenterology* 2008;135:1168–1175.

- 674 9. Li Q, Yu K. Improved correction for population stratification in  
675 genome-wide association studies by identifying hidden popula-  
676 tion structures. *Genet Epidemiol* 2008;32:215–226.
- 677 10. Purcell S, et al. PLINK: a tool set for whole-genome association  
678 and population-based linkage analyses. *Am J Hum Genet* 2007;  
679 81:559–575.
- 680 11. Barrett JC, et al. Haploview: analysis and visualization of LD and  
681 haplotype maps. *Bioinformatics* 2005;21:263–265.
- 682 12. Schaid DJ, et al. Score tests for association between traits and  
683 haplotypes when linkage phase is ambiguous. *Am J Hum Genet*  
684 2002;70:425–434.
- 685 13. Gauderman WJ, et al. Testing association between disease and  
686 multiple SNPs in a candidate gene. *Genet Epidemiol* 2007;31:  
687 383–395.
- 688 14. Wang K, Abbott D. A principal components regression approach  
689 to multilocus genetic association studies. *Genet Epidemiol*  
690 2008;32:108–118.
- 691 15. Team RDC. R: A language and environment for statistical com-  
692 puting. 2009.
- 693 16. Foulkes AS. Applied statistical genetics with R. Use R. New York:  
694 Springer, 2009.
- 695 17. Breiman L. Random forests. *Machine Learning* 2001;45:5–32.
- 696 18. Gauderman W, Morrison J. QUANTO 1.1: A computer program for  
697 power and sample size calculations for genetic-epidemiology  
698 studies. Available at: <http://hydra.usc.edu/gxe>. Accessed  
699 AQ: 45 680
- 700 19. Zheng G, et al. Testing association for markers on the X chromo-  
701 some. *Genet Epidemiol* 2007;31:834–843.
- 702 20. Petryshen T, Kirby A, Ainscow M. LocusView 2.0. Broad Institute. AQ: 46 683
- 
- 684 685 686 687 688 689 690 691 692 693 694 695 696 697 698 699 700 701 702 703 704 705 706 707 708 709 710 711 712 713 714 715 716 717 718 719 720 721 722 723 724 725 726 727 728 729

**Supplementary Table 1.** Genotyped Single Nucleotide Polymorphisms

| Chr | Gene                                                                             | Reference sequence         | SNP        | MAF  | Location      | Amino acid |
|-----|----------------------------------------------------------------------------------|----------------------------|------------|------|---------------|------------|
| 1   | 5,10-Methylenetetrahydrofolate reductase (MTHFR)                                 | NM_005957.2                | rs2274976  | 0.06 | Coding        | R593Q      |
|     |                                                                                  |                            | rs1801131  | 0.36 | Coding        | E428A      |
|     |                                                                                  |                            | rs1801133  | 0.24 | Coding        | A221V      |
|     |                                                                                  |                            | rs7533315  | 0.31 | Intron        |            |
|     |                                                                                  |                            | rs9651118  | 0.26 | Intron        |            |
|     |                                                                                  |                            | rs7525338  | 0.01 | Intron        |            |
|     |                                                                                  |                            | rs3737964  | 0.31 | Intron        |            |
| 1   | Natriuretic peptide precursor A (NPPA)<br>Natriuretic peptide precursor B (NPPB) | NM_006172.1<br>NM_002521.1 | rs198414   | 0.14 | 3UTR          |            |
|     |                                                                                  |                            | rs198358   | 0.27 | Flanking_3UTR |            |
|     |                                                                                  |                            | rs198359   | 0.11 | Flanking_3UTR |            |
|     |                                                                                  |                            | rs12024265 | na   | Flanking_3UTR |            |
|     |                                                                                  |                            | rs198361   | 0.15 | Flanking_3UTR |            |
|     |                                                                                  |                            | rs5065     | 0.15 | Coding        | *151R      |
|     |                                                                                  |                            | rs5063     | 0.06 | Coding        | V31M       |
|     |                                                                                  |                            | rs198373   | 0.12 | Flanking_5UTR |            |
|     |                                                                                  |                            | rs632793   | 0.43 | Flanking_5UTR |            |
|     |                                                                                  |                            | rs198381   | 0.12 | Flanking_3UTR |            |
|     |                                                                                  |                            | rs198388   | 0.46 | Flanking_3UTR |            |
|     |                                                                                  |                            | rs198389   | 0.45 | Flanking_5UTR |            |
|     |                                                                                  |                            | rs12406089 | 0.33 | Flanking_5UTR |            |
|     |                                                                                  |                            | rs3026913  | 0.17 | Flanking_3UTR |            |
| 1   | Endothelin converting enzyme 1 (ECE1)                                            | NM_001397.1                | rs2038089  | 0.43 | Intron        |            |
|     |                                                                                  |                            | rs9426748  | 0.43 | Intron        |            |
|     |                                                                                  |                            | rs212517   | 0.44 | Intron        |            |
|     |                                                                                  |                            | rs3026883  | 0.27 | Intron        |            |
|     |                                                                                  |                            | rs212539   | 0.39 | Intron        |            |
|     |                                                                                  |                            | rs212540   | 0.39 | Intron        |            |
|     |                                                                                  |                            | rs3026869  | 0.03 | Intron        |            |
|     |                                                                                  |                            | rs4654916  | 0.05 | Intron        |            |
|     |                                                                                  |                            | rs213045   | 0.25 | Flanking_5UTR |            |
|     |                                                                                  |                            | rs17162330 | 0.13 | Flanking_3UTR |            |
| 1   | Small heterodimer partner (NROB2)                                                | NM_021969.1                | rs17340482 | 0.16 | Flanking_3UTR |            |
|     |                                                                                  |                            | rs7504     | 0.31 | 3UTR          |            |
|     |                                                                                  |                            | rs6659176  | 0.09 | Coding        | G170A      |
| 1   | Tyrosine kinase with Ig and EGF Factor homology domains (TIE1)                   | NM_005424.2                | rs11581460 | 0.37 | Flanking_5UTR |            |
|     |                                                                                  |                            | rs11210831 | 0.33 | Flanking_5UTR |            |
|     |                                                                                  |                            | rs3120047  | 0.42 | Flanking_5UTR |            |
|     |                                                                                  |                            | rs7527092  | 0.45 | Intron        |            |
|     |                                                                                  |                            | rs1999595  | 0.15 | Intron        |            |
|     |                                                                                  |                            | rs2991990  | 0.42 | Intron        |            |
|     |                                                                                  |                            | rs1199039  | 0.43 | Coding        | L990L      |
|     |                                                                                  |                            | rs1098182  | 0.06 | Intron        |            |
|     |                                                                                  |                            | rs11210834 | 0.23 | Intron        |            |
|     |                                                                                  |                            | rs1810765  | 0.08 | Flanking_5UTR |            |
| 1   | Calcium-binding protein A4 (S100A4)                                              | NM_002961.2                | rs743687   | 0.16 | Flanking_3UTR |            |
|     |                                                                                  |                            | rs730347   | 0.00 | Flanking_3UTR |            |
|     |                                                                                  |                            | rs1051044  | 0.03 | 3UTR          |            |
|     |                                                                                  |                            | rs2071631  |      | Coding        | E48E       |
|     |                                                                                  |                            | rs1005436  | 0.16 | Flanking_5UTR |            |
| 1   | C-reactive protein (CRP)                                                         | NM_000567.2                | rs2794520  | 0.33 | Flanking_3UTR |            |
|     |                                                                                  |                            | rs2808630  | 0.28 | Flanking_3UTR |            |
|     |                                                                                  |                            | rs1205     | 0.33 | 3UTR          |            |
|     |                                                                                  |                            | rs1130864  | 0.30 | 3UTR          |            |
|     |                                                                                  |                            | rs1800947  | 0.07 | Coding        | L183L      |
|     |                                                                                  |                            | rs1417938  | 0.33 | Intron        |            |
|     |                                                                                  |                            | rs3091244  | 0.05 | Flanking_5UTR |            |
|     |                                                                                  |                            | rs3093060  | 0.00 | Flanking_5UTR |            |
| 2   | Rho-associated protein kinase 2 (ROCK2)                                          | NM_004850.3                | rs2290156  | 0.31 | Intron        |            |
|     |                                                                                  |                            | rs12470004 | 0.38 | Intron        |            |
|     |                                                                                  |                            | rs2011812  | 0.42 | Intron        |            |

Supplementary Table 1. Continued

| Chr | Gene                                               | Reference sequence | SNP        | MAF  | Location      | Amino acid |
|-----|----------------------------------------------------|--------------------|------------|------|---------------|------------|
|     |                                                    |                    | rs3771109  | 0.01 | Intron        |            |
|     |                                                    |                    | rs9808232  | 0.42 | Coding        | T430N      |
|     |                                                    |                    | rs1868585  | 0.31 | Intron        |            |
|     |                                                    |                    | rs6716817  | 0.50 | Intron        |            |
|     |                                                    |                    | rs3771106  | 0.38 | Intron        |            |
|     |                                                    |                    | rs1868584  | 0.19 | Intron        |            |
|     |                                                    |                    | rs4669700  | 0.20 | Intron        |            |
|     |                                                    |                    | rs4668720  | 0.24 | Intron        |            |
|     |                                                    |                    | rs10929728 | 0.36 | Intron        |            |
|     |                                                    |                    | rs11695377 | 0.20 | Intron        |            |
|     |                                                    |                    | rs7575837  | 0.24 | Intron        |            |
|     |                                                    |                    | rs7355489  | 0.24 | Intron        |            |
| 2   | Xanthine dehydrogenase (XDH)                       | NM_000379.2        | rs1042039  | 0.47 | Flanking_3UTR |            |
|     |                                                    |                    | rs2268800  | 0.47 | Intron        |            |
|     |                                                    |                    | rs207444   | 0.06 | Intron        |            |
|     |                                                    |                    | rs169596   | 0.48 | Intron        |            |
|     |                                                    |                    | rs4952085  | 0.23 | Intron        |            |
|     |                                                    |                    | rs1896846  | 0.27 | Intron        |            |
|     |                                                    |                    | rs7597755  | 0.02 | Intron        |            |
|     |                                                    |                    | rs992137   | 0.01 | Intron        |            |
|     |                                                    |                    | rs17038412 | 0.19 | Intron        |            |
|     |                                                    |                    | rs1366817  | 0.32 | Intron        |            |
|     |                                                    |                    | rs2281547  | 0.46 | Intron        |            |
|     |                                                    |                    | rs3769618  | 0.45 | Intron        |            |
|     |                                                    |                    | rs185925   | 0.23 | Intron        |            |
|     |                                                    |                    | rs206847   | 0.22 | Intron        |            |
|     |                                                    |                    | rs206851   | 0.21 | Intron        |            |
|     |                                                    |                    | rs206855   | 0.40 | Intron        |            |
|     |                                                    |                    | rs206857   | 0.18 | Intron        |            |
|     |                                                    |                    | rs206860   | 0.21 | Intron        |            |
|     |                                                    |                    | rs494852   | 0.14 | Intron        |            |
|     |                                                    |                    | rs1346644  | 0.13 | Intron        |            |
|     |                                                    |                    | rs3769616  | 0.02 | Intron        |            |
|     |                                                    |                    | rs206811   | 0.20 | Intron        |            |
|     |                                                    |                    | rs206812   | 0.32 | Flanking_5UTR |            |
|     |                                                    |                    | rs7575607  | 0.22 | Flanking_5UTR |            |
| 2   | Bone morphogenetic protein receptor type II (BMP2) | NM_001204.5        | rs1980153  | 0.14 | Intron        |            |
|     |                                                    |                    | rs4303700  | 0.20 | Intron        |            |
|     |                                                    |                    | rs6435149  | 0.27 | Intron        |            |
|     |                                                    |                    | rs16839149 | 0.13 | Intron        |            |
|     |                                                    |                    | rs4675278  | 0.27 | Intron        |            |
|     |                                                    |                    | rs12477602 | 0.14 | Intron        |            |
|     |                                                    |                    | rs12621870 | 0.23 | Intron        |            |
|     |                                                    |                    | rs7605442  | 0.06 | Intron        |            |
|     |                                                    |                    | rs7562876  | 0.47 | Intron        |            |
|     |                                                    |                    | rs1199496  | 0.31 | Intron        |            |
|     |                                                    |                    | rs2228545  | 0.03 | Coding        | S774N      |
|     |                                                    |                    | BMP2600    | na   | Intron        |            |
| 2   | Serotonin 2B receptor (HTR2B)                      | NM_000867.2        | rs10191678 | 0.00 | Flanking_3UTR |            |
|     |                                                    |                    | rs6437000  | 0.23 | Intron        |            |
|     |                                                    |                    | rs10194776 | 0.33 | Intron        |            |
|     |                                                    |                    | rs1549339  | 0.26 | Intron        |            |
|     |                                                    |                    | rs17586428 | 0.03 | Intron        |            |
|     |                                                    |                    | rs3806545  | 0.06 | Flanking_5UTR |            |
|     |                                                    |                    | rs765458   | 0.25 | Flanking_5UTR |            |
|     |                                                    |                    | rs10498257 | 0.25 | Flanking_5UTR |            |
| 3   | Caveolin 3 (CAV3)                                  | NM_033337.1        | rs12486403 | 0.19 | Flanking_5UTR |            |
|     |                                                    |                    | rs11926335 | 0.18 | Flanking_5UTR |            |
|     |                                                    |                    | rs10490801 | 0.17 | Flanking_5UTR |            |
|     |                                                    |                    | rs9816472  | 0.18 | Flanking_5UTR |            |
|     |                                                    |                    | rs237860   | 0.42 | Flanking_5UTR |            |
|     |                                                    |                    | rs237862   | 0.39 | Flanking_5UTR |            |

Te1b

**Supplementary Table 1.** Continued

| Chr | Gene                                                         | Reference sequence | SNP        | MAF  | Location      | Amino acid |
|-----|--------------------------------------------------------------|--------------------|------------|------|---------------|------------|
|     |                                                              |                    | rs2268485  | 0.38 | Flanking_5UTR |            |
|     |                                                              |                    | rs2072581  | 0.18 | Flanking_5UTR |            |
|     |                                                              |                    | rs1008642  | 0.22 | Coding        | N32N       |
|     |                                                              |                    | rs1558991  | 0.23 | Intron        |            |
|     |                                                              |                    | rs10490800 | 0.10 | Intron        |            |
|     |                                                              |                    | rs13061909 | 0.18 | Intron        |            |
|     |                                                              |                    | rs4686300  | 0.03 | Intron        |            |
|     |                                                              |                    | rs237870   | 0.29 | Intron        |            |
|     |                                                              |                    | rs237871   | 0.25 | Intron        |            |
|     |                                                              |                    | rs237872   | 0.47 | Intron        |            |
|     |                                                              |                    | rs151462   | 0.24 | Intron        |            |
|     |                                                              |                    | rs237875   | 0.46 | Intron        |            |
|     |                                                              |                    | rs13087941 | 0.28 | Coding        | F40F       |
| 3   | Peroxisome proliferator activated receptor, $\gamma$ (PPARG) | NM_005037          | rs2972164  | 0.49 | Intron        |            |
|     |                                                              |                    | rs4684846  | 0.22 | Intron        |            |
|     |                                                              |                    | rs880663   | 0.21 | Intron        |            |
|     |                                                              |                    | rs10510418 | 0.35 | Intron        |            |
|     |                                                              |                    | rs1801282  | 0.08 | Coding        |            |
|     |                                                              |                    | rs17817276 | 0.35 | Intron        |            |
|     |                                                              |                    | rs2938395  | 0.38 | Intron        |            |
|     |                                                              |                    | rs1151996  | 0.38 | Intron        |            |
|     |                                                              |                    | rs1175540  | 0.34 | Intron        |            |
|     |                                                              |                    | rs1175542  | 0.49 | Intron        |            |
|     |                                                              |                    | rs1797912  | 0.40 | Intron        |            |
|     |                                                              |                    | rs3856806  | 0.10 | Coding        | H446H      |
|     |                                                              |                    | rs1152003  | 0.32 | Flanking_3UTR |            |
|     |                                                              |                    | kr1805192  | na   | Intron        |            |
| 3   | Retinoic acid receptor, $\beta$ (RAR $\beta$ )               | NM_000965.2        | rs6550978  | 0.36 | Intron        |            |
|     |                                                              |                    | rs6550980  | 0.19 | Intron        |            |
|     |                                                              |                    | rs871963   | 0.35 | Intron        |            |
|     |                                                              |                    | rs4607073  | 0.40 | Intron        |            |
|     |                                                              |                    | rs11715516 | 0.16 | Intron        |            |
|     |                                                              |                    | rs1432603  | 0.22 | Intron        |            |
|     |                                                              |                    | rs1286656  | 0.10 | Intron        |            |
|     |                                                              |                    | rs2056777  | 0.16 | Intron        |            |
|     |                                                              |                    | rs1286641  | 0.32 | Intron        |            |
|     |                                                              |                    | rs1153584  | 0.40 | Intron        |            |
|     |                                                              |                    | rs1286646  | 0.15 | Intron        |            |
|     |                                                              |                    | rs1881706  | 0.33 | Intron        |            |
|     |                                                              |                    | rs1153589  | 0.18 | Intron        |            |
|     |                                                              |                    | rs1153597  | 0.41 | Intron        |            |
|     |                                                              |                    | rs1153598  | 0.10 | Intron        |            |
|     |                                                              |                    | rs1153604  | 0.33 | Intron        |            |
|     |                                                              |                    | rs1286665  | 0.23 | Intron        |            |
|     |                                                              |                    | rs7616062  | 0.23 | Intron        |            |
|     |                                                              |                    | rs1286773  | 0.10 | Intron        |            |
|     |                                                              |                    | rs1286772  | 0.33 | Intron        |            |
|     |                                                              |                    | rs1435706  | 0.35 | Intron        |            |
|     |                                                              |                    | rs1626875  | 0.14 | Intron        |            |
|     |                                                              |                    | rs1286765  | 0.46 | Intron        |            |
|     |                                                              |                    | rs1286761  | 0.15 | Intron        |            |
|     |                                                              |                    | rs12635379 | 0.22 | Intron        |            |
|     |                                                              |                    | rs1656465  | 0.14 | Intron        |            |
|     |                                                              |                    | rs1631354  | 0.48 | Intron        |            |
|     |                                                              |                    | rs1730226  | 0.49 | Intron        |            |
|     |                                                              |                    | rs9809535  | 0.11 | Intron        |            |
| 3   | Pregnane X receptor (NR1I2)                                  | NM_003889.3        | rs7643038  | 0.40 | Flanking_5UTR |            |
|     |                                                              |                    | rs2472671  | 0.11 | Intron        |            |
|     |                                                              |                    | rs2472672  | 0.11 | Intron        |            |
|     |                                                              |                    | rs1403527  | 0.11 | Intron        |            |
|     |                                                              |                    | rs1403526  | 0.24 | Intron        |            |

Supplementary Table 1. Continued

| Chr | Gene                                                            | Reference sequence | SNP        | MAF  | Location      | Amino acid |
|-----|-----------------------------------------------------------------|--------------------|------------|------|---------------|------------|
|     |                                                                 |                    | rs4440154  | 0.35 | Intron        |            |
|     |                                                                 |                    | rs2461823  | 0.35 | Intron        |            |
|     |                                                                 |                    | rs7643645  | 0.30 | Intron        |            |
|     |                                                                 |                    | rs2472680  | 0.02 | Intron        |            |
|     |                                                                 |                    | rs3732357  | 0.23 | Intron        |            |
|     |                                                                 |                    | rs6784598  | 0.30 | Intron        |            |
|     |                                                                 |                    | rs3732359  | 0.07 | 3UTR          |            |
|     |                                                                 |                    | rs1054190  | 0.18 | 3UTR          |            |
| 4   | Recombination signal-binding protein 1 for J- $\kappa$ (RBPSUH) | NM_005349.2        | rs3822223  | 0.06 | Intron        |            |
|     |                                                                 |                    | rs2077777  | 0.05 | Intron        |            |
|     |                                                                 |                    | rs1877207  | 0.48 | Intron        |            |
|     |                                                                 |                    | rs3762930  | 0.48 | Intron        |            |
|     |                                                                 |                    | rs2667065  | 0.03 | Intron        |            |
|     |                                                                 |                    | rs6821126  | 0.20 | Intron        |            |
|     |                                                                 |                    | rs4330343  | 0.20 | Intron        |            |
|     |                                                                 |                    | rs2725303  | 0.46 | Intron        |            |
|     |                                                                 |                    | rs3109836  | 0.20 | Intron        |            |
|     |                                                                 |                    | rs13109703 | 0.43 | Intron        |            |
|     |                                                                 |                    | rs13114911 | 0.43 | Intron        |            |
|     |                                                                 |                    | rs10517097 | 0.03 | Intron        |            |
|     |                                                                 |                    | rs946346   | 0.10 | Intron        |            |
| 4   | Nuclear factor $\kappa$ B p105 subunit (NFKB1)                  | NM_003998.2        | rs980455   | 0.46 | Flanking_5UTR |            |
|     |                                                                 |                    | rs3774934  | 0.06 | Intron        |            |
|     |                                                                 |                    | rs1599961  | 0.46 | Intron        |            |
|     |                                                                 |                    | rs230533   | 0.37 | Intron        |            |
|     |                                                                 |                    | rs4647992  | 0.07 | Intron        |            |
|     |                                                                 |                    | rs230498   | 0.38 | Intron        |            |
|     |                                                                 |                    | rs4648072  | 0.02 | Coding        | M506V      |
|     |                                                                 |                    | rs11722146 | 0.34 | Intron        |            |
|     |                                                                 |                    | rs4648099  | 0.00 | Coding        | H711Q      |
|     |                                                                 |                    | rs3774968  | 0.34 | Intron        |            |
|     |                                                                 |                    | rs4648110  | 0.22 | Intron        |            |
|     |                                                                 |                    | rs1609798  | 0.35 | Intron        |            |
|     |                                                                 |                    | rs997476   | 0.10 | Flanking_3UTR |            |
| 4   | Phosphodiesterase 5 (PDE5A)                                     | NM_001083.3        | rs17006190 | 0.22 | 3UTR          |            |
|     |                                                                 |                    | rs3775843  | 0.22 | Intron        |            |
|     |                                                                 |                    | rs1480933  | 0.44 | Intron        |            |
|     |                                                                 |                    | rs10003953 | 0.00 | Intron        |            |
|     |                                                                 |                    | rs1155576  | 0.22 | Intron        |            |
|     |                                                                 |                    | rs10034450 | 0.19 | Intron        |            |
|     |                                                                 |                    | rs11731756 | 0.22 | Intron        |            |
|     |                                                                 |                    | rs2248236  | 0.23 | Intron        |            |
|     |                                                                 |                    | rs3733526  | 0.18 | Coding        | A92V       |
| 4   | Endothelin receptor, type A (EDNRA)                             | NM_001957.1        | rs6842241  | 0.16 | Flanking_5UTR |            |
|     |                                                                 |                    | rs6823537  | 0.29 | Intron        |            |
|     |                                                                 |                    | rs7655670  | 0.33 | Intron        |            |
|     |                                                                 |                    | rs4563479  | 0.10 | Intron        |            |
|     |                                                                 |                    | rs1568136  | 0.23 | Intron        |            |
|     |                                                                 |                    | rs6827096  | 0.16 | Intron        |            |
|     |                                                                 |                    | rs1878404  | 0.18 | Intron        |            |
|     |                                                                 |                    | rs10008744 | 0.22 | Intron        |            |
|     |                                                                 |                    | rs2048894  | 0.24 | Intron        |            |
|     |                                                                 |                    | rs5333     | 0.23 | Coding        | H322H      |
|     |                                                                 |                    | rs5343     | 0.38 | 3UTR          |            |
| 5   | Betaine-homocysteine methyltransferase (BHMT)                   | NM_001713.1        | rs542852   | 0.38 | Intron        |            |
|     |                                                                 |                    | rs492842   | 0.42 | Intron        |            |
|     |                                                                 |                    | rs567754   | 0.29 | Intron        |            |
|     |                                                                 |                    | rs3733890  | 0.28 | Coding        | R238Q      |
| 5   | CD14 molecule (CD14)                                            | NM_000591.1        | rs4914     | 0.09 | Coding        | L366L      |
|     |                                                                 |                    | rs2569190  | 0.47 | Flanking_5UTR |            |
|     |                                                                 |                    | rs2569193  | 0.23 | Flanking_5UTR |            |

Supplementary Table 1. Continued

| Chr        | Gene                                         | Reference sequence | SNP        | MAF                        | Location      | Amino acid |
|------------|----------------------------------------------|--------------------|------------|----------------------------|---------------|------------|
| 6          | Endothelin 1 (EDN1)                          | NM_001955.2        | rs3087459  | 0.18                       | Flanking_5UTR |            |
|            |                                              |                    | rs1476046  | 0.25                       | Intron        |            |
|            |                                              |                    | rs2071942  |                            | Intron        |            |
|            |                                              |                    | rs1630736  | 0.49                       | Intron        |            |
|            |                                              |                    | rs5370     | 0.24                       | Coding        | K197N      |
|            |                                              |                    | rs2859338  | 0.42                       | Flanking_3UTR |            |
| 6          | Tumor necrosis factor (TNF)                  | NM_000594.2        | rs6906760  | 0.06                       | Flanking_3UTR |            |
|            |                                              |                    | rs2844482  | 0.16                       | Flanking_5UTR |            |
|            |                                              |                    | rs2229094  | 0.26                       | Coding        | C12R       |
|            |                                              |                    | rs1800630  | 0.09                       | Flanking_3UTR |            |
|            |                                              |                    | rs11574936 | 0.00                       | Coding        | I193N      |
|            |                                              |                    | rs769177   | 0.03                       | Flanking_3UTR |            |
|            |                                              |                    | rs3093559  | 0.02                       | Flanking_3UTR |            |
|            |                                              |                    | rs389883   | 0.36                       | Intron        |            |
| 6          | Vascular endothelial growth factor (VEGF)    | NM_001025366.1     | rs389512   | 0.08                       | Intron        |            |
|            |                                              |                    | rs12525076 | 0.42                       | Intron        |            |
|            |                                              |                    | rs833060   | 0.30                       | Flanking_5UTR |            |
|            |                                              |                    | rs699947   | 0.41                       | Flanking_5UTR |            |
|            |                                              |                    | rs2010963  | 0.42                       | 5UTR          |            |
|            |                                              |                    | rs833069   | 0.34                       | Intron        |            |
|            |                                              |                    | rs3025010  | 0.35                       | Intron        |            |
|            |                                              |                    | rs3025033  | 0.18                       | Intron        |            |
|            |                                              |                    | rs3025035  | 0.10                       | Intron        |            |
|            |                                              |                    | 6          | Estrogen receptor 1 (ESR1) | NM_000125.2   | rs488133   |
| rs2077647  | 0.48                                         | Coding             |            |                            |               | S9S        |
| rs532010   | 0.32                                         | Intron             |            |                            |               |            |
| rs6902771  | 0.42                                         | Intron             |            |                            |               |            |
| rs2234693  | 0.41                                         | Intron             |            |                            |               |            |
| rs1709182  | 0.37                                         | Intron             |            |                            |               |            |
| rs712221   | 0.41                                         | Intron             |            |                            |               |            |
| rs11155819 | 0.35                                         | Intron             |            |                            |               |            |
| rs9340835  | 0.37                                         | Intron             |            |                            |               |            |
| rs1913474  | 0.21                                         | Intron             |            |                            |               |            |
| rs2347867  | 0.30                                         | Intron             |            |                            |               |            |
| rs4870062  | 0.28                                         | Intron             |            |                            |               |            |
| rs6927072  | 0.28                                         | Intron             |            |                            |               |            |
| rs1801132  | 0.18                                         | Coding             |            |                            |               | P324P      |
| rs3020314  | 0.29                                         | Intron             |            |                            |               |            |
| rs3020317  | 0.12                                         | Intron             |            |                            |               |            |
| rs1884051  | 0.30                                         | Intron             |            |                            |               |            |
| rs6557177  | 0.17                                         | Intron             |            |                            |               |            |
| rs985694   | 0.12                                         | Intron             |            |                            |               |            |
| rs3020403  | 0.23                                         | Intron             |            |                            |               |            |
| rs932477   | 0.03                                         | Intron             |            |                            |               |            |
| rs926777   | 0.18                                         | Intron             |            |                            |               |            |
| rs3020328  | 0.19                                         | Intron             |            |                            |               |            |
| rs7754762  | 0.07                                         | Intron             |            |                            |               |            |
| rs7757956  | 0.19                                         | Intron             |            |                            |               |            |
| rs3020411  | 0.39                                         | Intron             |            |                            |               |            |
| rs2982712  | 0.48                                         | Intron             |            |                            |               |            |
| rs3020368  | 0.13                                         | Intron             |            |                            |               |            |
| rs9322354  | 0.07                                         | Intron             |            |                            |               |            |
| rs9479190  | 0.08                                         | Intron             |            |                            |               |            |
| rs2982896  | 0.32                                         | Intron             |            |                            |               |            |
| rs3020381  | 0.40                                         | Intron             |            |                            |               |            |
| rs2474148  | 0.36                                         | Intron             |            |                            |               |            |
| rs2813544  | 0.22                                         | Flanking_3UTR      |            |                            |               |            |
| rs2747649  | 0.23                                         | Flanking_3UTR      |            |                            |               |            |
| rs1543403  | 0.45                                         | Flanking_3UTR      |            |                            |               |            |
| 6          | Superoxide dismutase 2, mitochondrial (SOD2) | NM_00636.2         | rs2758329  | 0.46                       | Flanking_3UTR |            |
|            |                                              |                    | rs8031     | 0.43                       | Intron        |            |
|            |                                              |                    | rs5746136  | 0.28                       | 3UTR          |            |



Supplementary Table 1. Continued

| Chr       | Gene                                         | Reference sequence | SNP        | MAF  | Location      | Amino acid |
|-----------|----------------------------------------------|--------------------|------------|------|---------------|------------|
| 6         | Plasminogen (PLG)                            | NM_000301.1        | rs9458005  | 0.21 | Flanking_5UTR |            |
|           |                                              |                    | rs783144   | 0.27 | Flanking_5UTR |            |
|           |                                              |                    | rs2314852  | 0.19 | Flanking_5UTR |            |
|           |                                              |                    | rs1950562  | 0.39 | Flanking_5UTR |            |
|           |                                              |                    | rs1819138  | 0.02 | Intron        |            |
|           |                                              |                    | rs4252092  | 0.42 | Intron        |            |
|           |                                              |                    | rs1465620  | 0.25 | Intron        |            |
|           |                                              |                    | rs783147   | 0.42 | Intron        |            |
|           |                                              |                    | rs1321201  | 0.43 | Intron        |            |
|           |                                              |                    | rs783146   | 0.11 | Intron        |            |
|           |                                              |                    | rs13231    | 0.32 | Coding        | Q360Q      |
|           |                                              |                    | rs4252125  | 0.33 | Coding        | D471N      |
|           |                                              |                    | rs783145   | 0.48 | Intron        |            |
|           |                                              |                    | rs813641   | 0.11 | Intron        |            |
|           |                                              |                    | rs3757017  | 0.25 | Intron        |            |
|           |                                              |                    | rs4252151  | 0.47 | Intron        |            |
|           |                                              |                    | rs4252166  | 0.22 | Intron        |            |
|           |                                              |                    | rs783176   | 0.13 | Intron        |            |
|           |                                              |                    | rs11060    | 0.47 | Coding        | G761G      |
|           |                                              |                    | rs4252200  | 0.04 | Flanking_3UTR |            |
| rs783166  | 0.13                                         | Flanking_3UTR      |            |      |               |            |
| 7         | Ikaros (IKZF1)                               | NM_006060.2        | rs6976046  | 0.03 | Intron        |            |
|           |                                              |                    | rs7789106  | 0.02 | Intron        |            |
|           |                                              |                    | rs10230385 | 0.21 | Intron        |            |
|           |                                              |                    | rs6962370  | 0.19 | Intron        |            |
|           |                                              |                    | rs6964823  | 0.47 | Intron        |            |
|           |                                              |                    | rs6952409  | 0.28 | Intron        |            |
|           |                                              |                    | rs6973210  | 0.32 | Intron        |            |
| 7         | Elastin (ELN)                                | NM_000501.1        | rs3757583  | 0.13 | Flanking_5UTR |            |
|           |                                              |                    | rs868005   | 0.37 | Intron        |            |
|           |                                              |                    | rs4717865  | 0.14 | Intron        |            |
|           |                                              |                    | rs10949834 | 0.16 | Intron        |            |
|           |                                              |                    | rs11770302 | 0.16 | Flanking_3UTR |            |
| 7         | Plasminogen activator inhibitor 1 (SERPINE1) | NM_000602.1        | rs6950982  | 0.23 | Flanking_5UTR |            |
|           |                                              |                    | rs6465787  | 0.02 | Flanking_5UTR |            |
|           |                                              |                    | rs6956010  | 0.23 | Flanking_5UTR |            |
|           |                                              |                    | rs2227631  | 0.40 | Flanking_5UTR |            |
|           |                                              |                    | rs6090     | 0.01 | Coding        | V16I       |
|           |                                              |                    | rs2227708  | 0.03 | Intron        |            |
|           |                                              |                    | rs2070682  | 0.48 | Intron        |            |
| 7         | Caveolin 2 (CAV2)<br>Caveolin 1 (CAV1)       | NM_001233.3        | rs1050813  | 0.19 | 3UTR          |            |
|           |                                              |                    | rs2227714  | 0.06 | 3UTR          |            |
|           |                                              | NM_001753.3        | rs987791   | 0.10 | Flanking_5UTR |            |
|           |                                              |                    | rs4730742  | 0.19 | Flanking_5UTR |            |
|           |                                              |                    | rs8940     | 0.20 | Coding        | A129E      |
|           |                                              |                    | rs4727833  | 0.47 | 3UTR          |            |
|           |                                              |                    | rs1052990  | 0.38 | 3UTR          |            |
|           |                                              |                    | rs6466579  | 0.47 | Flanking_3UTR |            |
|           |                                              |                    | rs2024211  | 0.28 | Flanking_3UTR |            |
|           |                                              |                    | rs4236601  | 0.28 | Flanking_5UTR |            |
|           |                                              |                    | rs926198   | 0.34 | Intron        |            |
|           |                                              |                    | rs9649394  | 0.42 | Intron        |            |
|           |                                              |                    | rs6466583  | 0.16 | Intron        |            |
|           |                                              |                    | rs10256914 | 0.25 | Intron        |            |
| rs1474510 | 0.15                                         | Intron             |            |      |               |            |
| rs3807986 | 0.26                                         | Intron             |            |      |               |            |
| rs3807989 | 0.44                                         | Intron             |            |      |               |            |
| rs3801993 | 0.10                                         | Intron             |            |      |               |            |
| rs729949  | 0.28                                         | Intron             |            |      |               |            |
| rs3807994 | 0.28                                         | Intron             |            |      |               |            |
| rs6466587 | 0.18                                         | Intron             |            |      |               |            |
| rs1049337 | 0.25                                         | 3UTR               |            |      |               |            |

Supplementary Table 1. Continued

| Chr | Gene                                          | Reference sequence | SNP                    | MAF         | Location      | Amino acid |        |  |
|-----|-----------------------------------------------|--------------------|------------------------|-------------|---------------|------------|--------|--|
| 7   | Nitric oxide synthase 3 (NOS3)                | NM_000603.3        | rs10277237             | 0.27        | Flanking_5UTR |            |        |  |
|     |                                               |                    | rs2070744              | 0.00        | Intron        |            |        |  |
|     |                                               |                    | rs3918166              | 0.00        | Coding        | R111Q      |        |  |
|     |                                               |                    | rs1799983              | 0.34        | Coding        | D297E      |        |  |
|     |                                               |                    | rs3918227              | 0.13        | Intron        |            |        |  |
|     |                                               |                    | rs3730006              | 0.01        | Intron        |            |        |  |
|     |                                               |                    | rs3918232              | 0.01        | Coding        | V826M      |        |  |
|     |                                               |                    | rs743507               | 0.18        | Intron        |            |        |  |
|     |                                               |                    | rs3918234              | 0.02        | Coding        | Q981L      |        |  |
|     |                                               |                    | rs2566518              | 0.02        | Intron        |            |        |  |
| 8   |                                               |                    | Angiotensin 1 (ANGPT1) | NM_001146.3 | rs1954727     | 0.30       | 3UTR   |  |
|     |                                               |                    |                        |             | rs2514872     | 0.13       | Intron |  |
|     |                                               |                    |                        |             | rs2514878     | 0.36       | Intron |  |
|     |                                               |                    |                        |             | rs10505101    | 0.23       | Intron |  |
|     | rs10505102                                    | 0.11               |                        |             | Intron        |            |        |  |
|     | rs4354281                                     | 0.11               |                        |             | Intron        |            |        |  |
|     | rs4236785                                     | 0.21               |                        |             | Intron        |            |        |  |
|     | rs4324901                                     | 0.38               |                        |             | Intron        |            |        |  |
|     | rs6469108                                     | 0.47               |                        |             | Intron        |            |        |  |
|     | rs7011605                                     | 0.24               |                        |             | Intron        |            |        |  |
|     | rs4626569                                     | 0.08               |                        |             | Intron        |            |        |  |
|     | rs1283651                                     | 0.24               |                        |             | Intron        |            |        |  |
|     | rs1433195                                     | 0.15               |                        |             | Intron        |            |        |  |
|     | rs2217673                                     | 0.13               |                        |             | Intron        |            |        |  |
|     | rs2163870                                     | 0.43               |                        |             | Intron        |            |        |  |
|     | rs2514857                                     | 0.47               |                        |             | Intron        |            |        |  |
|     | rs1654718                                     | 0.20               |                        |             | Intron        |            |        |  |
|     | rs1433175                                     | 0.32               |                        |             | Intron        |            |        |  |
|     | rs1654725                                     | 0.40               |                        |             | Intron        |            |        |  |
|     | rs1433179                                     | 0.40               |                        |             | Intron        |            |        |  |
|     | rs1654730                                     | 0.40               |                        |             | Intron        |            |        |  |
|     | rs4268102                                     | 0.25               |                        |             | Intron        |            |        |  |
|     | rs1283695                                     | 0.15               |                        |             | Intron        |            |        |  |
|     | rs1283673                                     | 0.43               |                        |             | Intron        |            |        |  |
|     | rs1433189                                     | 0.23               |                        |             | Intron        |            |        |  |
|     | rs1283701                                     | 0.40               |                        |             | Intron        |            |        |  |
|     | rs1283698                                     | 0.11               |                        |             | Intron        |            |        |  |
|     | rs4734967                                     | 0.31               |                        |             | Intron        |            |        |  |
|     | rs2916084                                     | 0.36               |                        |             | Intron        |            |        |  |
|     | rs1368495                                     | 0.31               |                        |             | Intron        |            |        |  |
|     | rs4114169                                     | 0.37               | Intron                 |             |               |            |        |  |
|     | rs1654680                                     | 0.15               | Intron                 |             |               |            |        |  |
|     | rs1433165                                     | 0.43               | Intron                 |             |               |            |        |  |
|     | rs1283720                                     | 0.17               | Intron                 |             |               |            |        |  |
|     | rs1433168                                     | 0.43               | Intron                 |             |               |            |        |  |
|     | rs10505108                                    | 0.06               | Intron                 |             |               |            |        |  |
|     | rs17302560                                    | 0.34               | Intron                 |             |               |            |        |  |
| 9   | Cyclin-dependent kinase inhibitor 2A (CDKN2A) | NM_000077.3        | rs3731257              | 0.27        | Flanking_3UTR |            |        |  |
|     |                                               |                    | rs11515                | 0.13        | 3UTR          |            |        |  |
|     |                                               |                    | rs2518719              | 0.15        | Intron        |            |        |  |
|     |                                               |                    | rs3731246              | 0.09        | Intron        |            |        |  |
|     |                                               |                    | rs2811708              | 0.25        | Intron        |            |        |  |
|     |                                               |                    | rs3731239              | 0.38        | Intron        |            |        |  |
|     |                                               |                    | rs2811709              | 0.11        | Intron        |            |        |  |
|     |                                               |                    | rs4074785              | 0.10        | Intron        |            |        |  |
|     |                                               |                    | rs3731221              | 0.01        | Intron        |            |        |  |
|     |                                               |                    | rs3731198              | 0.15        | Intron        |            |        |  |
|     |                                               |                    | rs3218020              | 0.36        | Flanking_5UTR |            |        |  |
|     |                                               |                    | rs2811712              | 0.11        | Flanking_5UTR |            |        |  |
|     |                                               |                    | rs3218009              | 0.10        | Flanking_5UTR |            |        |  |
|     |                                               |                    | rs1888221              | 0.25        | Flanking_3UTR |            |        |  |
| 9   | Tenascin C (TNC)                              | NM_002160.1        | rs1888221              | 0.25        | Flanking_3UTR |            |        |  |

Supplementary Table 1. Continued

| Chr | Gene                                                 | Reference sequence | SNP        | MAF  | Location      | Amino acid |
|-----|------------------------------------------------------|--------------------|------------|------|---------------|------------|
|     |                                                      |                    | rs1330362  | 0.05 | Flanking_3UTR |            |
|     |                                                      |                    | rs13321    | 0.29 | Coding        | E2007Q     |
|     |                                                      |                    | rs3789875  | 0.28 | Intron        |            |
|     |                                                      |                    | rs2274751  | 0.08 | Intron        |            |
|     |                                                      |                    | rs953288   | 0.38 | Intron        |            |
|     |                                                      |                    | rs1547691  | 0.28 | Intron        |            |
|     |                                                      |                    | rs1330368  | 0.47 | Intron        |            |
|     |                                                      |                    | rs944225   | 0.25 | Intron        |            |
|     |                                                      |                    | rs1330349  | 0.43 | Intron        |            |
|     |                                                      |                    | rs1330351  | 0.48 | Intron        |            |
|     |                                                      |                    | rs944227   | 0.44 | Intron        |            |
|     |                                                      |                    | rs1617917  | 0.33 | Intron        |            |
|     |                                                      |                    | rs1250019  | 0.44 | Intron        |            |
|     |                                                      |                    | rs1330360  | 0.41 | Intron        |            |
|     |                                                      |                    | rs3748166  | 0.28 | Intron        |            |
| 9   | Endoglin (ENG)                                       | NM_000118.1        | rs4451422  | 0.34 | Flanking_3UTR |            |
|     |                                                      |                    | rs1330684  | 0.33 | Intron        |            |
|     |                                                      |                    | rs5031024  | 0.03 | Intron        |            |
|     |                                                      |                    | rs10819309 | 0.50 | Intron        |            |
|     |                                                      |                    | rs12001427 | 0.04 | Intron        |            |
|     |                                                      |                    | rs1800956  | 0.01 | Coding        | D365H      |
|     |                                                      |                    | rs3739817  | 0.08 | Coding        | T342T      |
|     |                                                      |                    | rs10987750 | 0.33 | Intron        |            |
|     |                                                      |                    | rs11792480 | 0.36 | Intron        |            |
|     |                                                      |                    | rs10121110 | 0.44 | Intron        |            |
|     |                                                      |                    | rs10819312 | 0.13 | Intron        |            |
|     |                                                      |                    | rs4836585  | 0.14 | Intron        |            |
|     |                                                      |                    | rs4837192  | 0.14 | Intron        |            |
|     |                                                      |                    | rs10987759 | 0.09 | Flanking_5UTR |            |
|     |                                                      |                    | rs7865146  | 0.27 | Flanking_5UTR |            |
| 10  | Growth differentiation factor 2 (GDF2)               | NM_016204.1        | rs9325886  | 0.08 | Flanking_3UTR |            |
|     |                                                      |                    | rs9421799  | 0.37 | Flanking_3UTR |            |
|     |                                                      |                    | rs3740297  | 0.02 | 3UTR          |            |
|     |                                                      |                    | rs7923671  | 0.04 | Intron        |            |
|     |                                                      |                    | rs11204215 | 0.13 | Flanking_5UTR |            |
| 10  | Bone morphogenetic protein receptor type 1a (BMPR1A) | NM_004329.2        | rs3905377  | 0.31 | Flanking_5UTR |            |
|     |                                                      |                    | rs7072166  | 0.01 | Intron        |            |
|     |                                                      |                    | rs6586034  | 0.39 | Intron        |            |
|     |                                                      |                    | rs7088641  | 0.31 | Intron        |            |
|     |                                                      |                    | rs11202169 | 0.02 | Intron        |            |
|     |                                                      |                    | rs7096781  | 0.28 | Intron        |            |
|     |                                                      |                    | rs4933411  | 0.31 | Intron        |            |
|     |                                                      |                    | rs6586039  | 0.03 | Intron        |            |
|     |                                                      |                    | rs4934268  | 0.38 | Intron        |            |
|     |                                                      |                    | rs4934272  | 0.22 | Intron        |            |
|     |                                                      |                    | rs1124482  | 0.34 | Intron        |            |
|     |                                                      |                    | rs11202221 | 0.19 | Intron        |            |
|     |                                                      |                    | rs2354354  | 0.30 | Intron        |            |
|     |                                                      |                    | rs2883420  | 0.42 | Intron        |            |
|     |                                                      |                    | rs7894198  | 0.09 | Intron        |            |
|     |                                                      |                    | rs4934275  | 0.13 | Intron        |            |
|     |                                                      |                    | rs10749542 | 0.25 | Intron        |            |
|     |                                                      |                    | rs12777504 | 0.03 | Intron        |            |
|     |                                                      |                    | rs12269120 | 0.02 | Intron        |            |
|     |                                                      |                    | rs7909264  | 0.10 | Flanking_3UTR |            |
| 10  | Nuclear factor $\kappa$ B p100 subunit (NFKB2)       | NM_01077493.1      | rs1572532  | 0.00 | Flanking_5UTR |            |
|     |                                                      |                    | rs11574845 | 0.00 | Intron        |            |
|     |                                                      |                    | rs7897947  | 0.16 | Intron        |            |
|     |                                                      |                    | rs7077329  | na   | Intron        |            |
|     |                                                      |                    | rs1056890  | 0.36 | 3UTR          |            |
| 11  | Tryptophan hydroxylase (TPH1)                        | NM_004179.1        | rs10741734 | 0.40 | Intron        |            |
|     |                                                      |                    | rs2111102  | 0.17 | Intron        |            |

Supplementary Table 1. Continued

| Chr | Gene                                                        | Reference sequence | SNP                                                                 | MAF         | Location      | Amino acid |        |  |
|-----|-------------------------------------------------------------|--------------------|---------------------------------------------------------------------|-------------|---------------|------------|--------|--|
| 11  | Nuclear factor $\kappa$ B p65 subunit (RELA)                | NM_021975.2        | rs1799913                                                           | na          | Intron        |            |        |  |
|     |                                                             |                    | rs1800532                                                           | 0.38        | Intron        |            |        |  |
|     |                                                             |                    | rs10488683                                                          | 0.50        | Intron        |            |        |  |
|     |                                                             |                    | rs172423                                                            | 0.33        | Intron        |            |        |  |
|     |                                                             |                    | rs10488682                                                          | 0.33        | Flanking_5UTR |            |        |  |
|     |                                                             |                    | rs623580                                                            | 0.28        | Flanking_5UTR |            |        |  |
|     |                                                             |                    | rs1466462                                                           | 0.38        | Flanking_3UTR |            |        |  |
|     |                                                             |                    | rs1049728                                                           | 0.03        | Flanking_3UTR |            |        |  |
|     |                                                             |                    | rs11227247                                                          | 0.16        | Intron        |            |        |  |
|     |                                                             |                    | rs7101916                                                           | 0.16        | Flanking_5UTR |            |        |  |
| 11  | NADPH Oxidase 4 (NOX4)                                      | NM_016931.2        | rs11821838                                                          | 0.11        | Intron        |            |        |  |
|     |                                                             |                    | rs317187                                                            | 0.40        | Intron        |            |        |  |
|     |                                                             |                    | rs1847137                                                           | 0.31        | Intron        |            |        |  |
|     |                                                             |                    | rs7944576                                                           | 0.08        | Intron        |            |        |  |
|     |                                                             |                    | rs317150                                                            | 0.10        | Intron        |            |        |  |
|     |                                                             |                    | rs317155                                                            | 0.44        | Intron        |            |        |  |
|     |                                                             |                    | rs546460                                                            | 0.43        | Intron        |            |        |  |
|     |                                                             |                    | rs2202150                                                           | 0.38        | Intron        |            |        |  |
|     |                                                             |                    | rs317147                                                            | 0.45        | Intron        |            |        |  |
|     |                                                             |                    | rs538102                                                            | 0.47        | Intron        |            |        |  |
|     |                                                             |                    | rs319016                                                            | 0.45        | Intron        |            |        |  |
|     |                                                             |                    | rs957140                                                            | 0.43        | Intron        |            |        |  |
|     |                                                             |                    | rs10830277                                                          | 0.13        | Intron        |            |        |  |
|     |                                                             |                    | rs2164521                                                           | 0.10        | Intron        |            |        |  |
|     |                                                             |                    | rs614128                                                            | 0.08        | Intron        |            |        |  |
|     |                                                             |                    | rs497279                                                            | 0.27        | Intron        |            |        |  |
|     |                                                             |                    | rs3017887                                                           | 0.09        | Flanking_5UTR |            |        |  |
|     |                                                             |                    | rs585197                                                            | 0.21        | Flanking_5UTR |            |        |  |
|     |                                                             |                    | rs553635                                                            | 0.09        | Flanking_5UTR |            |        |  |
| 11  |                                                             |                    | Transient receptor potential cation channel, subfamily C, 6 (TRPC6) | NM_004621.3 | rs11826762    | 0.09       | Intron |  |
|     |                                                             |                    |                                                                     |             | rs11224779    | 0.33       | Intron |  |
|     |                                                             |                    |                                                                     |             | rs11224783    | 0.25       | Intron |  |
|     |                                                             |                    |                                                                     |             | rs11821584    | 0.36       | Intron |  |
|     |                                                             |                    |                                                                     |             | rs7945727     | 0.12       | Intron |  |
|     |                                                             |                    |                                                                     |             | rs4403777     | 0.48       | Intron |  |
|     |                                                             |                    |                                                                     |             | rs7925012     | 0.47       | Intron |  |
|     |                                                             |                    |                                                                     |             | rs7101962     | 0.11       | Intron |  |
|     |                                                             |                    |                                                                     |             | rs7931676     | 0.32       | Intron |  |
|     | rs10895131                                                  | 0.12               |                                                                     |             | Intron        |            |        |  |
|     | rs4469857                                                   | 0.37               |                                                                     |             | Intron        |            |        |  |
|     | rs4331057                                                   | 0.36               |                                                                     |             | Intron        |            |        |  |
|     | rs10895142                                                  | 0.08               |                                                                     |             | Intron        |            |        |  |
|     | rs10895146                                                  | 0.48               |                                                                     |             | Intron        |            |        |  |
|     | rs10501985                                                  | 0.48               |                                                                     |             | Intron        |            |        |  |
|     | rs7103450                                                   | 0.16               |                                                                     |             | Intron        |            |        |  |
|     | rs7121108                                                   | 0.15               |                                                                     |             | Intron        |            |        |  |
|     | rs10895150                                                  | 0.09               |                                                                     |             | Flanking_5UTR |            |        |  |
| 11  | Matrix metalloproteinase 3 (MMP3)                           | NM_002422.3        | rs4754884                                                           | 0.42        | Flanking_3UTR |            |        |  |
|     |                                                             |                    | rs650108                                                            | 0.23        | Intron        |            |        |  |
|     |                                                             |                    | rs520540                                                            | 0.41        | Coding        | A361A      |        |  |
|     |                                                             |                    | rs566125                                                            | 0.11        | Intron        |            |        |  |
|     |                                                             |                    | rs679620                                                            | 0.43        | Coding        | K44E       |        |  |
| 12  | Potassium channel, voltage-gated, shaker, member 5 (KCN A5) | NM_002234.2        | rs522616                                                            | 0.13        | Flanking_5UTR |            |        |  |
|     |                                                             |                    | rs7973471                                                           | 0.11        | Flanking_5UTR |            |        |  |
|     |                                                             |                    | rs7298858                                                           | 0.12        | Flanking_5UTR |            |        |  |
|     |                                                             |                    | rs887353                                                            | 0.25        | Flanking_5UTR |            |        |  |
|     |                                                             |                    | rs11615552                                                          | 0.10        | Flanking_5UTR |            |        |  |
|     |                                                             |                    | rs3741930                                                           | 0.35        | 5UTR          |            |        |  |
|     |                                                             |                    | rs1860420                                                           | 0.48        | Flanking_3UTR |            |        |  |
|     |                                                             |                    | rs12311859                                                          | 0.25        | Flanking_3UTR |            |        |  |
|     |                                                             |                    | rs10774297                                                          | 0.09        | Flanking_3UTR |            |        |  |

Telj

**Supplementary Table 1.** Continued

| Chr | Gene                                             | Reference sequence | SNP        | MAF  | Location      | Amino acid |
|-----|--------------------------------------------------|--------------------|------------|------|---------------|------------|
| 12  | Von Willebrand factor (VWF)                      | NM_000552.2        | rs7302727  | 0.20 | Flanking_3UTR |            |
|     |                                                  |                    | rs3809241  | 0.22 | Flanking_5UTR |            |
|     |                                                  |                    | rs7976955  | 0.22 | Flanking_3UTR |            |
|     |                                                  |                    | rs2270151  | 0.13 | Intron        |            |
|     |                                                  |                    | rs2286646  | 0.22 | Intron        |            |
|     |                                                  |                    | rs10774387 | 0.22 | Intron        |            |
|     |                                                  |                    | rs723189   | 0.41 | Intron        |            |
|     |                                                  |                    | rs4764478  | 0.24 | Intron        |            |
|     |                                                  |                    | rs917857   | 0.44 | Intron        |            |
|     |                                                  |                    | rs917858   | 0.33 | Intron        |            |
|     |                                                  |                    | rs2239138  | 0.33 | Intron        |            |
|     |                                                  |                    | rs216856   | 0.27 | Intron        |            |
|     |                                                  |                    | rs216867   | 0.08 | Coding        | T2412T     |
|     |                                                  |                    | rs2058473  | 0.43 | Intron        |            |
|     |                                                  |                    | rs216873   | 0.13 | Intron        |            |
|     |                                                  |                    | rs216891   | 0.48 | Intron        |            |
|     |                                                  |                    | rs216893   | 0.47 | Intron        |            |
|     |                                                  |                    | rs216902   | 0.26 | Coding        | C1947C     |
|     |                                                  |                    | rs216905   | 0.24 | Intron        |            |
|     |                                                  |                    | rs216805   | 0.29 | Intron        |            |
|     |                                                  |                    | rs216812   | 0.31 | Intron        |            |
|     |                                                  |                    | rs542993   | 0.46 | Intron        |            |
|     |                                                  |                    | rs216312   | 0.48 | Intron        |            |
|     |                                                  |                    | rs11609815 | 0.24 | Intron        |            |
|     |                                                  |                    | rs216330   | 0.31 | Intron        |            |
|     |                                                  |                    | rs216333   | 0.25 | Intron        |            |
|     |                                                  |                    | rs11614912 | 0.22 | Intron        |            |
|     |                                                  |                    | rs10849378 | 0.26 | Intron        |            |
|     |                                                  |                    | rs11064004 | 0.29 | Intron        |            |
|     |                                                  |                    | rs216290   | 0.13 | Intron        |            |
|     |                                                  |                    | rs1063856  | 0.34 | Coding        | T788A      |
|     |                                                  |                    | rs216303   | 0.12 | Intron        |            |
|     |                                                  |                    | rs980130   | 0.31 | Intron        |            |
|     |                                                  |                    | rs980131   | 0.38 | Intron        |            |
|     |                                                  |                    | rs1800378  | 0.38 | Coding        | H483R      |
|     |                                                  |                    | rs2238104  | 0.44 | Intron        |            |
|     |                                                  |                    | rs2109118  | 0.48 | Intron        |            |
|     |                                                  |                    | rs2239144  | 0.09 | Intron        |            |
|     |                                                  |                    | rs3782716  | 0.35 | Intron        |            |
|     |                                                  |                    | rs10849387 | 0.35 | Flanking_5UTR |            |
| 12  | Elastase 1 (ELA1)                                | NM_001971.4        | rs4762040  | 0.37 | Intron        |            |
|     |                                                  |                    | rs4762041  | 0.28 | Intron        |            |
|     |                                                  |                    | rs3843650  | 0.38 | Intron        |            |
|     |                                                  |                    | rs7311196  | 0.18 | Flanking_5UTR |            |
|     |                                                  |                    | rs7138439  | 0.37 | 3UTR          |            |
|     |                                                  |                    | rs10876162 | 0.37 | Intron        |            |
|     |                                                  |                    | rs3847862  | 0.46 | Intron        |            |
|     |                                                  |                    | rs17860299 |      | Coding        | R43W       |
| 12  | Activin A receptor, type II-like kinase (ACVRL1) | NM_000020.1        | rs3759178  | 0.35 | Flanking_5UTR |            |
|     |                                                  |                    | rs11169953 | 0.23 | Intron        |            |
|     |                                                  |                    | rs706812   | 0.00 | Intron        |            |
|     |                                                  |                    | rs2071219  |      | Intron        |            |
|     |                                                  |                    | rs706815   | 0.17 | Intron        |            |
|     |                                                  |                    | rs706824   | 0.22 | Flanking_3UTR |            |
| 12  | Retinoic acid receptor, $\gamma$ (RARG)          | NM_000966.3        | rs1554753  | 0.20 | Flanking_3UTR |            |
|     |                                                  |                    | rs3741434  | 0.12 | 3UTR          |            |
|     |                                                  |                    | rs2229774  | 0.04 | Coding        | S426L      |
|     |                                                  |                    | rs1465057  | 0.06 | Intron        |            |
|     |                                                  |                    | rs6580936  | 0.16 | Intron        |            |
|     |                                                  |                    | rs7398676  | 0.48 | Flanking_5UTR |            |
| 12  | Tryptophan hydroxylase 2 (TPH2)                  | NM_173353.2        | rs472197   | 0.44 | Intron        |            |
|     |                                                  |                    | rs10748185 | 0.44 | Intron        |            |

Supplementary Table 1. Continued

| Chr | Gene                                                 | Reference sequence | SNP        | MAF  | Location      | Amino acid |
|-----|------------------------------------------------------|--------------------|------------|------|---------------|------------|
| 12  | Farnesoid X receptor (NR1H4)                         | NM_005123.1        | rs2129575  | 0.20 | Intron        |            |
|     |                                                      |                    | rs1843809  | 0.13 | Intron        |            |
|     |                                                      |                    | rs1386494  | 0.13 | Intron        |            |
|     |                                                      |                    | rs1386493  | 0.15 | Intron        |            |
|     |                                                      |                    | rs1386492  | 0.15 | Intron        |            |
|     |                                                      |                    | rs6582078  | 0.34 | Intron        |            |
|     |                                                      |                    | rs1007023  | 0.12 | Intron        |            |
|     |                                                      |                    | rs1386497  | 0.12 | Intron        |            |
|     |                                                      |                    | rs1352250  | 0.38 | Intron        |            |
|     |                                                      |                    | rs1487278  | 0.22 | Intron        |            |
|     |                                                      |                    | rs9325202  | 0.35 | Intron        |            |
|     |                                                      |                    | rs1386486  | 0.30 | Intron        |            |
|     |                                                      |                    | rs7309440  | 0.02 | Flanking_3UTR |            |
|     |                                                      |                    | rs300510   | 0.46 | Intron        |            |
|     |                                                      |                    | rs11110390 | 0.32 | Intron        |            |
|     |                                                      |                    | rs4764980  | 0.49 | Intron        |            |
|     |                                                      |                    | rs17030285 | 0.14 | Intron        |            |
|     |                                                      |                    | rs1030454  | 0.17 | Intron        |            |
|     |                                                      |                    | rs35738    | 0.42 | Intron        |            |
|     |                                                      |                    | rs35735    | 0.40 | Intron        |            |
|     |                                                      |                    | rs35723    | 0.41 | Flanking_3UTR |            |
| 13  | Endothelin receptor, nonselective type (EDNRB)       | NM_000115.1        | rs1924919  | 0.19 | Flanking_3UTR |            |
|     |                                                      |                    | rs11149080 | 0.41 | Flanking_3UTR |            |
|     |                                                      |                    | rs4885491  | 0.12 | 3UTR          |            |
|     |                                                      |                    | rs3027095  | 0.03 | 3UTR          |            |
|     |                                                      |                    | rs3818416  | 0.21 | Intron        |            |
|     |                                                      |                    | rs5352     | 0.01 | Coding        | S304N      |
|     |                                                      |                    | rs5351     | 0.40 | Coding        | L276L      |
|     |                                                      |                    | rs2147555  | 0.08 | Intron        |            |
|     |                                                      |                    | rs2329046  | 0.40 | Intron        |            |
|     |                                                      |                    | rs4885493  | 0.28 | Intron        |            |
|     |                                                      |                    | rs7982910  | 0.48 | Intron        |            |
|     |                                                      |                    | rs3759475  | 0.41 | Intron        |            |
|     |                                                      |                    | rs9544638  | 0.40 | Intron        |            |
| 13  | Solute carrier family 10, member 2 (SLC10A2)         | NM_000452.1        | rs7992775  | 0.47 | Flanking_3UTR |            |
|     |                                                      |                    | rs6491729  | 0.27 | Flanking_3UTR |            |
|     |                                                      |                    | rs279941   | 0.19 | 3UTR          |            |
|     |                                                      |                    | rs190716   | 0.22 | Intron        |            |
|     |                                                      |                    | rs1854519  | 0.28 | Intron        |            |
|     |                                                      |                    | rs183963   | 0.33 | Intron        |            |
|     |                                                      |                    | rs4772525  | 0.31 | Intron        |            |
|     |                                                      |                    | rs157266   | 0.18 | Intron        |            |
|     |                                                      |                    | rs1886927  | 0.16 | Intron        |            |
|     |                                                      |                    | rs3759504  | 0.24 | Flanking_5UTR |            |
|     |                                                      |                    | rs466802   | 0.03 | Flanking_5UTR |            |
|     |                                                      |                    | rs7319981  | 0.30 | Flanking_5UTR |            |
| 14  | Hypoxia-inducible factor 1, $\alpha$ subunit (HIF1A) | NM_001530.2        | rs1951795  | 0.15 | Intron        |            |
|     |                                                      |                    | rs4899056  | 0.06 | Intron        |            |
|     |                                                      |                    | rs1957757  | 0.06 | Intron        |            |
|     |                                                      |                    | rs11158358 | 0.13 | Intron        |            |
|     |                                                      |                    | rs2301111  | 0.16 | Intron        |            |
|     |                                                      |                    | rs2301113  | 0.18 | Intron        |            |
|     |                                                      |                    | rs11549465 | 0.09 | Coding        | P581S      |
|     |                                                      |                    | rs1319462  | 0.17 | Flanking_3UTR |            |
| 14  | Estrogen receptor 2 (ESR2)                           | NM_001437.1        | rs1152579  | 0.38 | Flanking_3UTR |            |
|     |                                                      |                    | rs1256064  | 0.09 | Intron        |            |
|     |                                                      |                    | rs1256063  | 0.08 | Intron        |            |
|     |                                                      |                    | rs1256061  | 0.48 | Intron        |            |
|     |                                                      |                    | rs1256059  | 0.40 | Intron        |            |

1290  
1291  
1292  
1293  
1294  
1295  
1296  
1297  
1298  
1299  
1300  
1301  
1302  
1303  
1304  
1305  
1306  
1307  
1308  
1309  
1310  
1311  
1312  
1313  
1314  
1315  
1316  
1317  
1318  
1319  
1320  
1321  
1322  
1323  
1324  
1325  
1326  
1327  
1328  
1329  
1330  
1331  
1332  
1333  
1334  
1335  
1336  
1337  
1338  
1339  
1340  
1341  
1342  
1343  
1344  
1345

Telk

1290  
1291  
1292  
1293  
1294  
1295  
1296  
1297  
1298  
1299  
1300  
1301  
1302  
1303  
1304  
1305  
1306  
1307  
1308  
1309  
1310  
1311  
1312  
1313  
1314  
1315  
1316  
1317  
1318  
1319  
1320  
1321  
1322  
1323  
1324  
1325  
1326  
1327  
1328  
1329  
1330  
1331  
1332  
1333  
1334  
1335  
1336  
1337  
1338  
1339  
1340  
1341  
1342  
1343  
1344  
1345

Supplementary Table 1. Continued

| Chr | Gene                                                 | Reference sequence | SNP        | MAF  | Location      | Amino acid |
|-----|------------------------------------------------------|--------------------|------------|------|---------------|------------|
|     |                                                      |                    | rs8017441  | 0.13 | Intron        |            |
|     |                                                      |                    | rs7157428  | 0.09 | Intron        |            |
|     |                                                      |                    | rs1256049  | 0.03 | Coding        | V327V      |
|     |                                                      |                    | rs7154455  | 0.34 | Intron        |            |
|     |                                                      |                    | rs1256030  | 0.42 | Intron        |            |
|     |                                                      |                    | rs1952586  | 0.16 | Intron        |            |
|     |                                                      |                    | rs1887994  | 0.08 | Intron        |            |
|     |                                                      |                    | rs1271572  | 0.41 | Flanking_5UTR |            |
|     |                                                      |                    | rs975232   | 0.30 | Flanking_3UTR |            |
| 14  | Solute carrier family 10, member 1 (SLC10A1)         | NM_003049.1        | rs8013586  | 0.19 | Flanking_3UTR |            |
|     |                                                      |                    | rs9323529  | 0.01 | Intron        |            |
|     |                                                      |                    | rs2296651  | 0.00 | Coding        | S266F      |
|     |                                                      |                    | rs11624523 | 0.32 | Intron        |            |
|     |                                                      |                    | rs11622925 | 0.12 | Intron        |            |
| 14  | V-AKT murine Thymoma viral oncogene homolog 1 (AKT1) | NM_001014431.1     | rs2498804  | 0.33 | Flanking_3UTR |            |
|     |                                                      |                    | rs2494730  | 0.33 | Flanking_3UTR |            |
|     |                                                      |                    | rs2498802  | 0.34 | Flanking_3UTR |            |
|     |                                                      |                    | rs3730358  |      | Intron        |            |
|     |                                                      |                    | rs2494738  | 0.11 | Intron        |            |
|     |                                                      |                    | rs2494746  | 0.08 | Intron        |            |
|     |                                                      |                    | rs1130214  | 0.28 | 5UTR          |            |
| 15  | Thrombospondin-1 (THBS1)                             | NM_003246.2        | rs1478604  | 0.22 | 5UTR          |            |
|     |                                                      |                    | rs753599   | 0.10 | Intron        |            |
|     |                                                      |                    | rs2292305  | 0.10 | Coding        | T522A      |
|     |                                                      |                    | rs2228262  | 0.08 | Coding        | N699S      |
|     |                                                      |                    | rs1051442  | 0.12 | 3UTR          |            |
| 15  | Dual oxidase 2 (DUOX2)                               | NM_014080.3        | rs269866   | 0.36 | Intron        |            |
|     | Dual oxidase 1 (DUOX1)                               | NM_017434.3        | rs269863   | 0.02 | Intron        |            |
|     |                                                      |                    | rs1961660  | 0.01 | Intron        |            |
|     |                                                      |                    | rs269856   | 0.03 | Intron        |            |
|     |                                                      |                    | rs1365242  | 0.46 | Intron        |            |
|     |                                                      |                    | rs1706810  | 0.27 | Intron        |            |
|     |                                                      |                    | rs1648282  | 0.38 | Intron        |            |
|     |                                                      |                    | rs2020216  | 0.11 | Intron        |            |
|     |                                                      |                    | rs3784577  | 0.10 | Intron        |            |
|     |                                                      |                    | rs1706803  | 0.16 | Intron        |            |
|     |                                                      |                    | rs1706804  | 0.24 | Coding        | T1075T     |
|     |                                                      |                    | rs1706808  | 0.38 | Intron        |            |
|     |                                                      |                    | rs1648312  | 0.38 | 3UTR          |            |
|     |                                                      |                    | rs2292467  | 0.26 | 3UTR          |            |
| 15  | Aromatase (CYP19A1)                                  | NM_000103.2        | rs1706816  | 0.12 | Flanking_3UTR |            |
|     |                                                      |                    | rs1122044  | 0.50 | Flanking_3UTR |            |
|     |                                                      |                    | rs2414093  | 0.17 | Flanking_3UTR |            |
|     |                                                      |                    | rs4775928  | 0.38 | Flanking_3UTR |            |
|     |                                                      |                    | rs3759809  | 0.25 | Flanking_3UTR |            |
|     |                                                      |                    | rs934633   | 0.08 | Flanking_3UTR |            |
|     |                                                      |                    | rs10046    | 0.45 | 3UTR          |            |
|     |                                                      |                    | rs28757184 | 0.06 | Coding        | T200M      |
|     |                                                      |                    | rs2899472  | 0.27 | Intron        |            |
|     |                                                      |                    | rs700518   | 0.41 | Coding        | V79V       |
|     |                                                      |                    | rs10519295 | 0.10 | Intron        |            |
|     |                                                      |                    | rs727479   | 0.30 | Intron        |            |
|     |                                                      |                    | rs12591359 | 0.36 | Intron        |            |
|     |                                                      |                    | rs1062033  | 0.48 | Intron        |            |
|     |                                                      |                    | rs2008691  | 0.17 | Intron        |            |
|     |                                                      |                    | rs1008805  | 0.45 | Intron        |            |
|     |                                                      |                    | rs749292   | 0.46 | Intron        |            |
|     |                                                      |                    | rs1902586  | 0.05 | Intron        |            |
|     |                                                      |                    | rs936306   | 0.18 | Intron        |            |

Supplementary Table 1. Continued

| Chr        | Gene                                                | Reference sequence | SNP        | MAF  | Location      | Amino acid |
|------------|-----------------------------------------------------|--------------------|------------|------|---------------|------------|
| 15         | Homolog of drosophila mothers against dpp 3 (SMAD3) | NM_005902.3        | rs2470176  | 0.18 | Intron        |            |
|            |                                                     |                    | rs2470152  | 0.45 | Intron        |            |
|            |                                                     |                    | rs2470150  | 0.08 | Intron        |            |
|            |                                                     |                    | rs1902584  | 0.11 | Intron        |            |
|            |                                                     |                    | rs1004984  | 0.42 | Intron        |            |
|            |                                                     |                    | rs7175922  | 0.15 | Flanking_5UTR |            |
|            |                                                     |                    | rs12904944 | 0.32 | Intron        |            |
|            |                                                     |                    | rs10518707 | 0.48 | Intron        |            |
|            |                                                     |                    | rs4776881  | 0.42 | Intron        |            |
|            |                                                     |                    | rs12324036 | 0.42 | Intron        |            |
|            |                                                     |                    | rs7176870  | 0.41 | Intron        |            |
|            |                                                     |                    | rs9972423  | 0.42 | Intron        |            |
|            |                                                     |                    | rs2118612  | 0.21 | Intron        |            |
|            |                                                     |                    | rs1438386  | 0.32 | Intron        |            |
|            |                                                     |                    | rs718663   | 0.07 | Intron        |            |
|            |                                                     |                    | rs4776892  | 0.21 | Intron        |            |
|            |                                                     |                    | rs920293   | 0.06 | Intron        |            |
|            |                                                     |                    | rs11071937 | 0.33 | Intron        |            |
|            |                                                     |                    | rs4776342  | 0.23 | Intron        |            |
|            |                                                     |                    | rs991157   | 0.31 | Intron        |            |
|            |                                                     |                    | rs11071938 | 0.33 | Intron        |            |
|            |                                                     |                    | rs6494633  | 0.44 | Intron        |            |
|            |                                                     |                    | rs7178117  | 0.45 | Intron        |            |
|            |                                                     |                    | rs2414937  | 0.18 | Intron        |            |
|            |                                                     |                    | rs12443188 | 0.28 | Intron        |            |
|            |                                                     |                    | rs745103   | 0.38 | Intron        |            |
|            |                                                     |                    | rs893473   | 0.16 | Intron        |            |
|            |                                                     |                    | rs2289263  | 0.47 | Intron        |            |
|            |                                                     |                    | rs2033785  | 0.26 | Intron        |            |
|            |                                                     |                    | rs731874   | 0.30 | Intron        |            |
|            |                                                     |                    | rs12441344 | 0.23 | Intron        |            |
|            |                                                     |                    | rs2033784  | 0.28 | Intron        |            |
|            |                                                     |                    | rs7173698  | 0.33 | Intron        |            |
| rs11639295 | 0.32                                                | Intron             |            |      |               |            |
| rs7183244  | 0.40                                                | Intron             |            |      |               |            |
| rs2278545  | 0.10                                                | Intron             |            |      |               |            |
| rs1470003  | 0.47                                                | Intron             |            |      |               |            |
| rs3784681  | 0.30                                                | Intron             |            |      |               |            |
| rs6494636  | 0.49                                                | Intron             |            |      |               |            |
| rs8031440  | 0.19                                                | 3UTR               |            |      |               |            |
| 16         | Protein kinase C, $\beta$ 1 (PRKCB1)                | NM_002738.5        | rs3760106  | 0.18 | Flanking_5UTR |            |
|            |                                                     |                    | rs2575390  | 0.20 | Flanking_5UTR |            |
|            |                                                     |                    | rs2188357  |      | Intron        |            |
|            |                                                     |                    | rs195999   | 0.38 | Intron        |            |
|            |                                                     |                    | rs4788192  | 0.36 | Intron        |            |
|            |                                                     |                    | rs1971276  |      | Intron        |            |
|            |                                                     |                    | rs3729896  | 0.01 | Coding        | P201P      |
|            |                                                     |                    | rs7196765  |      | Intron        |            |
|            |                                                     |                    | rs1013316  | 0.41 | Intron        |            |
|            |                                                     |                    | rs429342   | 0.21 | Intron        |            |
| 16         | Matrix metalloproteinase 2 (MMP2)                   | NM_004530.2        | rs3729904  |      | Coding        | G589G      |
|            |                                                     |                    | rs3785380  | 0.02 | 3UTR          |            |
|            |                                                     |                    | rs243866   | 0.24 | Flanking_5UTR |            |
|            |                                                     |                    | rs243865   | 0.18 | Flanking_5UTR |            |
|            |                                                     |                    | rs857403   | 0.13 | Intron        |            |
|            |                                                     |                    | rs1132896  | 0.43 | Coding        | G225G      |
|            |                                                     |                    | rs1053605  | 0.08 | Coding        | T249T      |
|            |                                                     |                    | rs243842   | 0.36 | Intron        |            |
|            |                                                     |                    | rs243839   | 0.14 | Intron        |            |
|            |                                                     |                    | rs2287076  | 0.49 | Intron        |            |
| rs243836   | 0.48                                                | Intron             |            |      |               |            |
| rs243834   | 0.46                                                | Intron             |            |      |               |            |



Supplementary Table 1. Continued

| Chr | Gene                                    | Reference sequence | SNP        | MAF  | Location      | Amino acid |
|-----|-----------------------------------------|--------------------|------------|------|---------------|------------|
| 17  | Sex hormone binding globulin (SHBG)     | NM_001040.2        | rs17302903 | 0.50 | 5UTR          |            |
|     |                                         |                    | rs13894    | 0.10 | Coding        | R125C      |
|     |                                         |                    | rs858521   | 0.39 | Intron        |            |
|     |                                         |                    | rs6258     | 0.02 | Coding        | P184L      |
|     |                                         |                    | rs6259     | 0.14 | Coding        | D355N      |
|     |                                         |                    | rs2955617  | 0.38 | Flanking_3UTR |            |
|     |                                         |                    | rs1641544  | 0.07 | Flanking_3UTR |            |
| 17  | Nitric oxide synthase 2 (NOS2A)         | NM_000625.3        | rs4795051  | 0.49 | Flanking_3UTR |            |
|     |                                         |                    | rs7406657  | 0.19 | Flanking_3UTR |            |
|     |                                         |                    | rs8068149  | 0.35 | Intron        |            |
|     |                                         |                    | rs2314809  | 0.47 | Intron        |            |
|     |                                         |                    | rs2297516  | 0.34 | Intron        |            |
|     |                                         |                    | rs2297517  | 0.00 | Intron        |            |
|     |                                         |                    | rs2248814  | 0.48 | Intron        |            |
|     |                                         |                    | rs4796052  | 0.17 | Intron        |            |
|     |                                         |                    | rs1137933  | 0.20 | Coding        | D384D      |
|     |                                         |                    | rs4795067  | 0.30 | Intron        |            |
|     |                                         |                    | rs1113283  | 0.22 | Intron        |            |
|     |                                         |                    | rs3729508  | 0.49 | Intron        |            |
|     |                                         |                    | rs944725   | 0.39 | Intron        |            |
|     |                                         |                    | rs3794764  | 0.18 | Intron        |            |
|     |                                         |                    | rs11080358 | 0.08 | Flanking_5UTR |            |
| 17  | Serotonin transporter                   | NM_001045.2        | rs7224199  | 0.48 | Flanking_3UTR |            |
|     |                                         |                    | rs1042173  | 0.43 | 3UTR          |            |
|     |                                         |                    | rs140701   | 0.42 | Intron        |            |
|     |                                         |                    | rs2020942  | 0.38 | Intron        |            |
|     |                                         |                    | rs6354     | 0.21 | UTR           |            |
|     |                                         |                    | rs2020936  | 0.20 | Intron        |            |
|     |                                         |                    | rs2020933  | 0.05 | Intron        |            |
| 17  | Retinoic acid receptor, $\alpha$ (RARA) | NM_000964.2        | rs2715554  | 0.16 | Intron        |            |
|     |                                         |                    | rs2715553  | 0.46 | Intron        |            |
|     |                                         |                    | rs9303285  | 0.17 | Intron        |            |
|     |                                         |                    | rs482284   | 0.28 | Intron        |            |
| 17  | Angiotensin I converting enzyme (ACE)   | NM_152830.1        | rs4305     | 0.40 | Intron        |            |
|     |                                         |                    | rs4309     | 0.46 | Coding        | P404P      |
|     |                                         |                    | rs4311     | 0.38 | Intron        |            |
|     |                                         |                    | rs4329     | 0.48 | Intron        |            |
|     |                                         |                    | rs4343     | 0.48 | Coding        | T775T      |
|     |                                         |                    | rs4344     | 0.49 | Intron        |            |
|     |                                         |                    | rs4353     | 0.48 | Intron        |            |
|     |                                         |                    | rs4362     | 0.49 | Coding        | F1128F     |
|     |                                         |                    | rs4363     | 0.50 | Intron        |            |
|     |                                         |                    | rs4461142  | 0.48 | Intron        |            |
|     |                                         |                    | rs4267385  | 0.42 | Intron        |            |
|     |                                         |                    | rs4459610  | 0.42 | Coding        | K714N      |
|     |                                         |                    | rs8066276  | 0.38 | Intron        |            |
|     |                                         |                    | rs12451328 | 0.39 | Intron        |            |
|     |                                         |                    | rs4968591  | 0.42 | Intron        |            |
| 17  | Protein kinase C, $\alpha$ (PRKCA)      | NM_002737.2        | rs6504413  | 0.05 | Intron        |            |
|     |                                         |                    | rs4328478  | 0.44 | Intron        |            |
|     |                                         |                    | rs12450534 | 0.23 | Intron        |            |
|     |                                         |                    | rs8078231  | 0.27 | Intron        |            |
|     |                                         |                    | rs4435295  | 0.07 | Intron        |            |
|     |                                         |                    | rs4561502  | 0.28 | Intron        |            |
|     |                                         |                    | rs4417581  | 0.09 | Intron        |            |
|     |                                         |                    | rs4790911  | 0.08 | Intron        |            |
|     |                                         |                    | rs16959227 | 0.11 | Intron        |            |
|     |                                         |                    | rs11079656 | 0.28 | Intron        |            |
|     |                                         |                    | rs973753   | 0.15 | Intron        |            |
|     |                                         |                    | rs7405806  | 0.25 | Intron        |            |
|     |                                         |                    | rs11079657 | 0.18 | Intron        |            |
|     |                                         |                    | rs990082   | 0.32 | Intron        |            |

Supplementary Table 1. Continued

| Chr | Gene                                                | Reference sequence | SNP        | MAF  | Location      | Amino acid |
|-----|-----------------------------------------------------|--------------------|------------|------|---------------|------------|
|     |                                                     |                    | rs228885   | 0.26 | Intron        |            |
|     |                                                     |                    | rs11654093 | 0.33 | Intron        |            |
|     |                                                     |                    | rs8074294  | 0.35 | Intron        |            |
|     |                                                     |                    | rs7211424  | 0.44 | Intron        |            |
|     |                                                     |                    | rs956952   | 0.17 | Intron        |            |
|     |                                                     |                    | rs1806448  | 0.26 | Intron        |            |
|     |                                                     |                    | rs1003598  | 0.48 | Intron        |            |
|     |                                                     |                    | rs2078153  | 0.24 | Intron        |            |
|     |                                                     |                    | rs1860984  | 0.08 | Intron        |            |
|     |                                                     |                    | rs887797   | 0.40 | Intron        |            |
|     |                                                     |                    | rs10491204 | 0.14 | Intron        |            |
|     |                                                     |                    | rs1985633  | 0.39 | Intron        |            |
|     |                                                     |                    | rs1860985  | 0.11 | Intron        |            |
|     |                                                     |                    | rs8068966  | 0.38 | Intron        |            |
|     |                                                     |                    | rs11867695 | 0.48 | Intron        |            |
|     |                                                     |                    | rs8071795  | 0.10 | Intron        |            |
|     |                                                     |                    | rs17710992 | 0.28 | Intron        |            |
|     |                                                     |                    | rs3889237  | 0.36 | Intron        |            |
|     |                                                     |                    | rs8464     | 0.15 | 3UTR          |            |
| 18  | Homolog of drosophila mothers against dpp 2 (SMAD2) | NM_005901.4        | rs1792666  | 0.48 | Flanking_3UTR |            |
|     |                                                     |                    | rs8085335  | 0.08 | Flanking_3UTR |            |
|     |                                                     |                    | rs1792684  | 0.48 | Intron        |            |
|     |                                                     |                    | rs9946556  | 0.45 | Intron        |            |
|     |                                                     |                    | rs1792658  | 0.22 | Intron        |            |
|     |                                                     |                    | rs1792683  | 0.43 | Intron        |            |
|     |                                                     |                    | rs1787177  | 0.08 | Intron        |            |
|     |                                                     |                    | rs1631576  | 0.47 | Intron        |            |
|     |                                                     |                    | rs11082639 | 0.48 | Intron        |            |
|     |                                                     |                    | rs4940086  | 0.34 | Intron        |            |
| 18  | Homolog of drosophila mothers against dpp 4 (SMAD4) | NM_005359.3        | rs12958604 | 0.42 | Intron        |            |
|     |                                                     |                    | rs12968012 | 0.40 | Intron        |            |
|     |                                                     |                    | rs10502913 | 0.27 | Intron        |            |
|     |                                                     |                    | rs3764465  | 0.42 | Intron        |            |
|     |                                                     |                    | rs948588   | 0.09 | Intron        |            |
| 19  | Elastase 2 (ELA2)                                   | NM_001972.2        | rs3761008  | 0.11 | Flanking_3UTR |            |
|     |                                                     |                    | rs3826946  | 0.14 | Flanking_3UTR |            |
|     |                                                     |                    | rs7260160  |      | Flanking_5UTR |            |
|     |                                                     |                    | rs1683564  | 0.38 | Flanking_5UTR |            |
| 19  | Transforming growth factor, $\beta$ -1 (TGFB1)      | NM_000660.3        | rs1800472  | 0.02 | Coding        | T262I      |
|     |                                                     |                    | rs4803455  | 0.48 | Intron        |            |
|     |                                                     |                    | rs2241715  | 0.30 | Intron        |            |
|     |                                                     |                    | rs1800469  | 0.31 | Flanking_3UTR |            |
|     |                                                     |                    | rs1982072  | 0.31 | Intron        |            |
| 19  | Apolipoprotein E (APOE)                             | NM_000041.2        | rs405509   | 0.50 | Flanking_5UTR |            |
|     |                                                     |                    | rs429358   |      | Coding        | C129R      |
|     |                                                     |                    | rs7412     | 0.28 | Coding        | R175C      |
|     |                                                     |                    | rs439401   | 0.38 | Flanking_3UTR |            |
| 19  | BCL2-associated X protein (BAX)                     | NM_138764.2        | rs11667200 | 0.12 | Flanking_5UTR |            |
|     |                                                     |                    | rs11667229 | 0.48 | Flanking_5UTR |            |
|     |                                                     |                    | rs11667351 | 0.14 | Flanking_5UTR |            |
|     |                                                     |                    | rs1009316  | 0.12 | Intron        |            |
|     |                                                     |                    | rs1805419  | 0.24 | Intron        |            |
|     |                                                     |                    | rs4645900  | 0.05 | 3UTR          |            |
| 19  | Protein kinase C, $\gamma$ (PRKCG)                  | NM_002739.3        | rs307941   | 0.09 | Flanking_5UTR |            |
|     |                                                     |                    | rs454006   | 0.25 | Intron        |            |
|     |                                                     |                    | rs3745406  | 0.35 | Coding        | N188N      |
|     |                                                     |                    | rs3745405  | 0.34 | Intron        |            |
|     |                                                     |                    | rs3844454  | 0.08 | Flanking_5UTR |            |
| 20  | Thrombomodulin (THBD)                               | NM_000361.2        | rs6076013  | 0.40 | Flanking_3UTR |            |
|     |                                                     |                    | rs3176123  | 0.18 | 3UTR          |            |
|     |                                                     |                    | rs6048519  | 0.40 | Flanking_5UTR |            |
|     |                                                     |                    | rs8123616  | 0.24 | Flanking_5UTR |            |

Supplementary Table 1. Continued

| Chr | Gene                                        | Reference sequence | SNP                                    | MAF         | Location      | Amino acid |
|-----|---------------------------------------------|--------------------|----------------------------------------|-------------|---------------|------------|
| 20  | Lipopolysaccharide binding protein (LBP)    | NM_004139.2        | rs1780616                              | 0.35        | Flanking_5UTR |            |
|     |                                             |                    | rs2232571                              | 0.11        | Flanking_5UTR |            |
|     |                                             |                    | rs12624843                             | 0.40        | Intron        |            |
|     |                                             |                    | rs1780623                              | 0.37        | Intron        |            |
|     |                                             |                    | rs1780627                              | 0.47        | Intron        |            |
|     | rs1780629                                   | 0.26               | Flanking_3UTR                          |             |               |            |
|     | rs737090                                    | 0.48               | Flanking_3UTR                          |             |               |            |
| 20  | Proteinase inhibitor 3; elafin (PI3)        | NM_002638.2        | rs1983649                              | 0.38        | Intron        |            |
|     |                                             |                    | rs6032040                              | 0.14        | Intron        |            |
|     |                                             |                    | rs2664581                              | 0.14        | Coding        | T33P       |
|     | rs2267864                                   | 0.16               | Flanking_3UTR                          |             |               |            |
| 20  | Matrix metalloproteinase 9 (MMP9)           | NM_004994.2        | rs4810482                              | 0.38        | Flanking_5UTR |            |
|     |                                             |                    | rs3918241                              | 0.19        | Flanking_5UTR |            |
|     |                                             |                    | rs1805088                              | 0.03        | Coding        | A19V       |
|     |                                             |                    | rs2250889                              | 0.05        | Coding        | R573P      |
|     |                                             |                    | rs3918261                              | 0.23        | Intron        |            |
|     | rs3918270                                   | 0.19               | Flanking_3UTR                          |             |               |            |
| 20  | Prostaglandin I2 synthase (PTGIS)           | NM_000961.3        | rs491025                               | 0.46        | Flanking_3UTR |            |
|     |                                             |                    | rs5602                                 | 0.46        | 3UTR          |            |
|     |                                             |                    | rs729824                               | 0.25        | Intron        |            |
|     |                                             |                    | rs7271624                              | 0.26        | Intron        |            |
|     |                                             |                    | rs6090996                              | 0.17        | Intron        |            |
|     |                                             |                    | rs508757                               | 0.13        | Intron        |            |
|     |                                             |                    | rs6091000                              | 0.03        | Intron        |            |
|     |                                             |                    | rs570022                               | 0.13        | Intron        |            |
|     |                                             |                    | rs491490                               | 0.29        | Intron        |            |
|     |                                             |                    | rs927068                               | 0.26        | Intron        |            |
|     |                                             |                    | rs477627                               | 0.13        | Intron        |            |
|     |                                             |                    | rs693649                               | 0.16        | Flanking_5UTR |            |
|     |                                             |                    | rs6019910                              | 0.07        | Flanking_5UTR |            |
|     |                                             |                    | rs10432782                             | 0.12        | Intron        |            |
| 21  |                                             |                    | Superoxide dismutase 1, soluble (SOD1) | NM_000454.4 | rs2070424     | 0.09       |
|     | rs1041740                                   | 0.23               |                                        |             | Intron        |            |
| 21  | Runt-related transcription factor 1 (RUNX1) | NM_001754.3        | rs2070369                              | 0.49        | Flanking_3UTR |            |
|     |                                             |                    | rs2070370                              | 0.45        | Flanking_3UTR |            |
|     |                                             |                    | rs2073354                              | 0.08        | Intron        |            |
|     |                                             |                    | rs2249650                              | 0.44        | Intron        |            |
|     |                                             |                    | rs2249884                              | 0.33        | Intron        |            |
|     |                                             |                    | rs2834642                              | 0.46        | Intron        |            |
|     |                                             |                    | rs2253319                              | 0.31        | Intron        |            |
|     |                                             |                    | rs2834646                              | 0.07        | Intron        |            |
|     |                                             |                    | rs2834647                              | 0.05        | Intron        |            |
|     |                                             |                    | rs2243988                              | 0.33        | Intron        |            |
|     |                                             |                    | rs2226303                              | 0.20        | Intron        |            |
|     |                                             |                    | rs2834650                              | 0.16        | Intron        |            |
|     |                                             |                    | rs2284612                              | 0.36        | Intron        |            |
|     |                                             |                    | rs2268281                              | 0.12        | Intron        |            |
|     |                                             |                    | rs2284613                              | 0.29        | Intron        |            |
|     |                                             |                    | rs2268284                              | 0.09        | Intron        |            |
|     |                                             |                    | rs8134380                              | 0.46        | Intron        |            |
|     |                                             |                    | rs968625                               | 0.22        | Intron        |            |
|     |                                             |                    | rs2834651                              | 0.36        | Intron        |            |
|     |                                             |                    | rs2248720                              | 0.48        | Intron        |            |
|     | rs2834654                                   | 0.22               | Intron                                 |             |               |            |
|     | rs2268290                                   | 0.14               | Intron                                 |             |               |            |
|     | rs2252585                                   | 0.30               | Intron                                 |             |               |            |
|     | rs2284617                                   | 0.20               | Intron                                 |             |               |            |
|     | rs2834656                                   | 0.20               | Intron                                 |             |               |            |
|     | rs2300396                                   | 0.22               | Intron                                 |             |               |            |
|     | rs2300400                                   | 0.18               | Intron                                 |             |               |            |
|     | rs13053063                                  | 0.14               | Intron                                 |             |               |            |
|     | rs2300401                                   | 0.32               | Intron                                 |             |               |            |

Supplementary Table 1. Continued

| Chr | Gene                                        | Reference sequence | SNP        | MAF  | Location      | Amino acid |
|-----|---------------------------------------------|--------------------|------------|------|---------------|------------|
|     |                                             |                    | rs2834662  | 0.25 | Intron        |            |
|     |                                             |                    | rs2834664  | 0.13 | Intron        |            |
|     |                                             |                    | rs1475840  | 0.48 | Intron        |            |
|     |                                             |                    | rs2834675  | 0.09 | Intron        |            |
|     |                                             |                    | rs2834676  | 0.46 | Intron        |            |
|     |                                             |                    | rs4817699  | 0.09 | Intron        |            |
|     |                                             |                    | rs2834680  | 0.05 | Intron        |            |
|     |                                             |                    | rs2834683  | 0.45 | Intron        |            |
|     |                                             |                    | rs2834684  | 0.31 | Intron        |            |
|     |                                             |                    | rs2051179  | 0.49 | Intron        |            |
|     |                                             |                    | rs2834703  | 0.36 | Intron        |            |
|     |                                             |                    | rs2834708  | 0.39 | Intron        |            |
|     |                                             |                    | rs2834709  | 0.41 | Intron        |            |
|     |                                             |                    | rs1981392  | 0.37 | Intron        |            |
|     |                                             |                    | rs2834714  | 0.36 | Intron        |            |
|     |                                             |                    | rs762248   | 0.10 | Intron        |            |
|     |                                             |                    | rs8130985  | 0.10 | Intron        |            |
|     |                                             |                    | rs2834726  | 0.07 | Intron        |            |
|     |                                             |                    | rs2834729  | 0.14 | Intron        |            |
|     |                                             |                    | rs2834732  | 0.43 | Intron        |            |
|     |                                             |                    | rs2834735  | 0.38 | Intron        |            |
|     |                                             |                    | rs2834736  | 0.36 | Intron        |            |
|     |                                             |                    | rs2242890  | 0.35 | Intron        |            |
|     |                                             |                    | rs2294163  | 0.16 | Intron        |            |
|     |                                             |                    | rs2834739  | 0.36 | Intron        |            |
|     |                                             |                    | rs1883066  | 0.15 | Intron        |            |
|     |                                             |                    | rs7280028  | 0.16 | Intron        |            |
|     |                                             |                    | rs7277157  | 0.24 | Intron        |            |
|     |                                             |                    | rs2834740  | 0.36 | Flanking_5UTR |            |
| 21  | Cystathionine- $\beta$ -synthase (CBS)      | NM_000071.1        | rs719037   | 0.45 | Flanking_3UTR |            |
|     |                                             |                    | rs12613    | 0.09 | 3UTR          |            |
|     |                                             |                    | rs4920037  | 0.22 | Intron        |            |
|     |                                             |                    | rs234705   | 0.34 | Intron        |            |
|     |                                             |                    | rs9982015  | 0.09 | Intron        |            |
|     |                                             |                    | rs11701048 | 0.09 | Intron        |            |
| 21  | Collagen, type XVIII, $\alpha$ -1 (COL18A1) | NM_130445.2        | rs2838665  | 0.33 | Flanking_5UTR |            |
|     |                                             |                    | rs2183589  | 0.13 | Flanking_5UTR |            |
|     |                                             |                    | rs2838906  | 0.32 | Flanking_5UTR |            |
|     |                                             |                    | rs879330   | 0.06 | Flanking_3UTR |            |
|     |                                             |                    | rs2838907  | 0.36 | Flanking_3UTR |            |
|     |                                             |                    | rs4819099  | 0.21 | Flanking_3UTR |            |
|     |                                             |                    | rs4819101  | 0.29 | Flanking_3UTR |            |
|     |                                             |                    | rs2838917  | 0.25 | 3UTR          |            |
|     |                                             |                    | rs2838920  | 0.11 | Coding        |            |
|     |                                             |                    | rs7281421  | 0.31 | Flanking_5UTR |            |
|     |                                             |                    | rs2838923  | 0.32 | Flanking_5UTR |            |
|     |                                             |                    | rs8126757  | 0.15 | Flanking_5UTR |            |
|     |                                             |                    | rs8129539  | 0.12 | Flanking_5UTR |            |
|     |                                             |                    | rs9985044  | 0.31 | Flanking_5UTR |            |
|     |                                             |                    | rs11089003 | 0.20 | Flanking_5UTR |            |
|     |                                             |                    | rs2015673  | 0.09 | Flanking_5UTR |            |
|     |                                             |                    | rs10854470 | 0.36 | Flanking_5UTR |            |
|     |                                             |                    | rs2838933  | 0.12 | Intron        |            |
|     |                                             |                    | rs2236470  | 0.21 | Intron        |            |
|     |                                             |                    | rs1556329  | 0.09 | Intron        |            |
|     |                                             |                    | rs2236475  | 0.20 | Intron        |            |
|     |                                             |                    | rs2236479  | 0.31 | Intron        |            |
|     |                                             |                    | rs7409857  | 0.45 | Intron        |            |
|     |                                             |                    | rs3753019  | 0.37 | Intron        |            |
|     |                                             |                    | rs2236483  | 0.38 | Intron        |            |
|     |                                             |                    | rs2838950  | 0.25 | Intron        |            |
|     |                                             |                    | rs7278425  | 0.14 | Intron        |            |

Supplementary Table 1. Continued

| Chr | Gene                                                         | Reference sequence | SNP        | MAF  | Location      | Amino acid |
|-----|--------------------------------------------------------------|--------------------|------------|------|---------------|------------|
| 22  | Heme oxygenase 1 (HMOX1)                                     | NM_002133.1        | rs1050351  | 0.42 | Coding        |            |
|     |                                                              |                    | rs2838951  | 0.47 | Intron        |            |
|     |                                                              |                    | rs12168789 | 0.00 | Flanking_5UTR |            |
|     |                                                              |                    | rs2071746  | 0.46 | Flanking_5UTR |            |
|     |                                                              |                    | rs2071748  | 0.38 | Intron        |            |
|     |                                                              |                    | rs2071749  | 0.49 | Intron        |            |
|     |                                                              |                    | rs11912889 | 0.07 | Intron        |            |
|     |                                                              |                    | rs5755720  | 0.30 | Intron        |            |
|     |                                                              |                    | rs2285112  | 0.39 | Intron        |            |
|     |                                                              |                    | rs743811   | 0.25 | Flanking_3UTR |            |
| 22  | Peroxisome proliferator activated receptor, $\alpha$ (PPARA) | NM_005036.4        | rs9627100  | 0.09 | Intron        |            |
|     |                                                              |                    | rs4253701  | 0.11 | Intron        |            |
|     |                                                              |                    | rs11703495 | 0.14 | Intron        |            |
|     |                                                              |                    | rs4253711  | 0.27 | Intron        |            |
|     |                                                              |                    | rs4823613  | 0.30 | Intron        |            |
|     |                                                              |                    | rs1800206  | 0.04 | Coding        | L161V      |
|     |                                                              |                    | rs4253755  | 0.18 | Intron        |            |
|     |                                                              |                    | rs4253760  | 0.21 | Intron        |            |
|     |                                                              |                    | rs11090819 | 0.06 | Intron        |            |
|     |                                                              |                    | kr1800234  | na   | Intron        |            |
| X   | Cytochrome b-245, NADPH Oxidase 2, NOX2 (CYBB)               | NM_000397.2        | rs6610650  | 0.13 | Flanking_5UTR |            |
|     |                                                              |                    | rs6520785  | 0.13 | Intron        |            |
|     |                                                              |                    | rs4827298  | 0.22 | Intron        |            |
|     |                                                              |                    | rs5964125  | 0.11 | Intron        |            |
|     |                                                              |                    | rs12848910 | 0.12 | Intron        |            |
|     |                                                              |                    | rs5964149  | 0.11 | Intron        |            |
|     |                                                              |                    | rs4828067  | 0.37 | Intron        |            |
| X   | NADPH Oxidase 1 (NOX1)                                       | NM_007052.3        | rs4828068  | 0.39 | Intron        |            |
|     |                                                              |                    | rs5921678  | 0.40 | Intron        |            |
|     |                                                              |                    | rs2266916  | 0.40 | Intron        |            |
|     |                                                              |                    | rs4827881  | 0.24 | Flanking_5UTR |            |
|     |                                                              |                    | rs6620949  | 0.42 | Flanking_5UTR |            |
|     |                                                              |                    | rs1883411  | 0.38 | Intron        |            |
|     |                                                              |                    | rs411017   | 0.27 | Flanking_5UTR |            |
| X   | Thromboplastin (HEMB)                                        | NM_000133.2        | rs371000   | 0.48 | Intron        |            |
|     |                                                              |                    | rs4149674  | 0.37 | Intron        |            |
|     |                                                              |                    | rs4149676  | 0.01 | Intron        |            |
|     |                                                              |                    | rs376165   | 0.38 | Intron        |            |
|     |                                                              |                    | rs422187   | 0.33 | Intron        |            |
|     |                                                              |                    | rs6048     | 0.33 | Coding        | T193A      |
|     |                                                              |                    | rs413957   | 0.18 | Intron        |            |
|     |                                                              |                    | rs4149762  | 0.12 | Intron        |            |
|     |                                                              |                    | rs434144   | 0.20 | Flanking_3UTR |            |
|     |                                                              |                    | rs3117074  | 0.18 | Flanking_3UTR |            |

NOTE. Genotyped single nucleotide polymorphisms, N = 1086. SNPs are organized by chromosome and candidate gene. National Center for Biotechnology Information reference sequence is indicated, as are the minor allele frequency and the type of SNP (coding, untranslated, intronic). Chr, chromosome; MAF, minor allele frequency; UTR, untranslated region; Intron, intronic; SNP, single nucleotide polymorphism.

**Supplementary Table 2.** Pair-Wise Linkage Disequilibrium Between SNPs in HPS Candidate Genes

| Gene    | SNP1       | SNP2       | D'   | 95% CI     | LOD   | r <sup>2</sup> | Distance between SNPs |
|---------|------------|------------|------|------------|-------|----------------|-----------------------|
| TIE1    | rs7527092  | rs2991990  | 0.97 | 0.87–1     | 19.43 | 0.51           | 12731                 |
|         | rs7527092  | rs1199039  | 0.89 | 0.77–0.96  | 15.65 | 0.46           | 17818                 |
|         | rs7527092  | rs11210834 | 0.97 | 0.84–1     | 15.77 | 0.43           | 20299                 |
|         | rs2991990  | rs1199039  | 1.00 | 0.96–1     | 49.2  | 0.95           | 5087                  |
|         | rs1199039  | rs11210834 | 1.00 | 0.84–1     | 9.9   | 0.26           | 2481                  |
| CAV3    | rs10490800 | rs237872   | 0.89 | 0.55–0.97  | 3.88  | 0.12           | 2732                  |
|         | rs13061909 | rs237872   | 1    | 0.69–1     | 4.86  | 0.15           | 1810                  |
|         | rs4686300  | rs237872   | 1    | 0.14–0.99  | 0.91  | 0.04           | 1690                  |
|         | rs237870   | rs237872   | 0.95 | 0.84–0.99  | 21.19 | 0.52           | 1372                  |
|         | rs237871   | rs237872   | 0.97 | 0.86–1     | 20.37 | 0.50           | 1040                  |
|         | rs237872   | rs151462   | 0.68 | 0.53–0.79  | 10.61 | 0.31           | 1169                  |
|         | rs237872   | rs237875   | 0.92 | 0.85–0.96  | 36.72 | 0.82           | 1968                  |
| ENG     | rs4836585  | rs4837192  | 0.97 | 0.89–1     | 32.82 | 0.91           | 2529                  |
| NOX4    | rs2164521  | rs585197   | 0.67 | 0.47–0.8   | 6.58  | 0.23           | 17636                 |
| ESR2    | rs1256061  | rs1256059  | 1.00 | 0.92–1     | 23.84 | 0.56           | 6824                  |
|         | rs1256061  | rs1256049  | 1.00 | 0.21–1     | 1.28  | 0.04           | 20458                 |
|         | rs1256061  | rs1256030  | 1.00 | 0.93–1     | 29.72 | 0.67           | 43577                 |
|         | rs1256059  | rs1256049  | 1.00 | 0.2–1      | 1.24  | 0.02           | 13634                 |
|         | rs1256059  | rs1256030  | 0.95 | 0.87–0.98  | 33.63 | 0.75           | 36753                 |
|         | rs1256049  | rs1256030  | 1.00 | 0.19–1     | 1.2   | 0.03           | 23119                 |
| RUNX1   | rs2248720  | rs2834726  | 0.54 | 0.08–0.83  | 0.55  | 0.02           | 147892                |
| COL18A1 | rs2838920  | rs7278425  | 0.11 | 0–0.29     | 0.26  | 0.01           | 85153                 |
| VWF     | rs4764478  | rs216891   | 0.42 | 0.14–0.63  | 1.45  | 0.05           | 21724                 |
|         | rs4764478  | rs216902   | 0.59 | 0.26–0.79  | 1.99  | 0.06           | 27262                 |
|         | rs4764478  | rs216312   | 0.08 | 0–0.35     | 0.06  | 0.00           | 50859                 |
|         | rs4764478  | rs11609815 | 0.06 | 0–0.28     | 0.06  | 0.00           | 56106                 |
|         | rs4764478  | rs216330   | 0    | 0–0.5      | 0     | 0              | 68505                 |
|         | rs4764478  | rs11614912 | 0.07 | 0.01–0.64  | 0.01  | 0              | 70430                 |
|         | rs4764478  | rs10849378 | 0.11 | 0.01–0.64  | 0.02  | 0.00           | 70549                 |
|         | rs4764478  | rs11064004 | 0.14 | 0.01–0.65  | 0.03  | 0.00           | 71613                 |
|         | rs4764478  | rs1063856  | 0.06 | 0–0.3      | 0.05  | 0.00           | 75409                 |
|         | rs4764478  | rs980130   | 0.10 | 0.01–0.56  | 0.03  | 0.00           | 90902                 |
|         | rs4764478  | rs980131   | 0.06 | 0–0.47     | 0.01  | 0              | 91073                 |
|         | rs216873   | rs216891   | 0.29 | 0.05–0.52  | 0.72  | 0.03           | 4575                  |
|         | rs216891   | rs216893   | 1    | 0.95–1     | 46.61 | 0.91           | 636                   |
|         | rs216891   | rs216902   | 0.89 | 0.78–0.95  | 21.05 | 0.52           | 5538                  |
|         | rs216891   | rs216905   | 1    | 0.85–1     | 11.89 | 0.25           | 6406                  |
|         | rs216891   | rs216805   | 0.97 | 0.86–1     | 18.34 | 0.42           | 11627                 |
|         | rs216891   | rs216812   | 0.87 | 0.71–0.94  | 11.84 | 0.31           | 17362                 |
|         | rs216893   | rs216902   | 1    | 0.93–1     | 27.81 | 0.60           | 4902                  |
|         | rs216893   | rs216905   | 1    | 0.84–1     | 10.43 | 0.23           | 5770                  |
|         | rs216893   | rs216805   | 1    | 0.9–1      | 18.06 | 0.40           | 10991                 |
|         | rs216893   | rs216812   | 1    | 0.9–1      | 16.87 | 0.38           | 16726                 |
|         | rs216893   | rs542993   | 0.57 | 0.4–0.7    | 6.11  | 0.19           | 19946                 |
|         | rs216902   | rs216905   | 1    | 0.89–1     | 16.93 | 0.38           | 868                   |
|         | rs216902   | rs216805   | 0.98 | 0.9–1      | 28.3  | 0.64           | 6089                  |
|         | rs216902   | rs11609815 | 0.31 | 0.06–0.53  | 0.77  | 0.04           | 28844                 |
|         | rs216902   | rs980130   | 0.01 | –0.01–0.25 | 0     | 0              | 63640                 |
|         | rs216905   | rs216805   | 1    | 0.92–1     | 25.6  | 0.57           | 5221                  |
|         | rs216905   | rs216812   | 1    | 0.92–1     | 26.73 | 0.61           | 10956                 |
|         | rs216905   | rs542993   | 0.45 | 0.24–0.62  | 2.91  | 0.08           | 14176                 |
|         | rs216905   | rs216312   | 0.28 | 0.08–0.46  | 1.26  | 0.04           | 22729                 |
|         | rs216805   | rs216812   | 0.49 | 0.36–0.6   | 7.46  | 0.23           | 5735                  |
|         | rs216805   | rs216312   | 0.03 | –0.01–0.21 | 0.03  | 0.001          | 17508                 |
|         | rs216805   | rs11609815 | 0.25 | 0.05–0.44  | 0.83  | 0.03           | 22755                 |
|         | rs216312   | rs11609815 | 0.78 | 0.6–0.89   | 8.69  | 0.28           | 5247                  |
|         | rs216312   | rs216330   | 0.83 | 0.71–0.9   | 19.81 | 0.51           | 17646                 |
|         | rs216312   | rs11614912 | 0.92 | 0.76–0.98  | 11.57 | 0.32           | 19571                 |
|         | rs216312   | rs10849378 | 0.66 | 0.46–0.79  | 6.36  | 0.20           | 19690                 |
|         | rs216312   | rs11064004 | 0.66 | 0.48–0.79  | 6.81  | 0.21           | 20754                 |
|         | rs216312   | rs980130   | 0.60 | 0.44–0.73  | 7.03  | 0.24           | 40043                 |
|         | rs216312   | rs980131   | 0.52 | 0.37–0.63  | 6.7   | 0.23           | 40214                 |

**Supplementary Table 2.** Continued

| Gene | SNP1       | SNP2       | D'   | 95% CI    | LOD   | r <sup>2</sup> | Distance between SNPs |
|------|------------|------------|------|-----------|-------|----------------|-----------------------|
|      | rs11609815 | rs216330   | 0.94 | 0.83–0.99 | 19.05 | 0.53           | 12399                 |
|      | rs11609815 | rs11614912 | 1    | 0.93–1    | 32.55 | 0.85           | 14324                 |
|      | rs11609815 | rs10849378 | 0.88 | 0.79–0.94 | 25.35 | 0.73           | 14443                 |
|      | rs11609815 | rs11064004 | 0.86 | 0.76–0.92 | 22.85 | 0.68           | 15507                 |
|      | rs11609815 | rs980130   | 0.56 | 0.38–0.69 | 5.59  | 0.22           | 34796                 |
|      | rs216330   | rs11614912 | 1    | 0.9–1     | 19.57 | 0.51           | 1925                  |
|      | rs216330   | rs10849378 | 0.80 | 0.66–0.89 | 13.07 | 0.41           | 2044                  |
|      | rs216330   | rs11064004 | 0.78 | 0.63–0.87 | 12.58 | 0.39           | 3108                  |
|      | rs216330   | rs980130   | 0.68 | 0.55–0.77 | 13.04 | 0.40           | 22397                 |
|      | rs11064004 | rs1063856  | 0.95 | 0.86–0.99 | 25.7  | 0.69           | 3796                  |

TIE1, Tyrosine kinase with Ig and EGF Factor homology domains; CAV3, caveolin 3; ENG, endoglin; NOX4, NADPH oxidase 4; ESR2, estrogen receptor 2; RUNX1, Runt-related transcription factor 1; COL18A1, Collagen, type XVIII,  $\alpha$ -1; VWF, von Willebrand factor; 95% CI, 95% confidence interval.

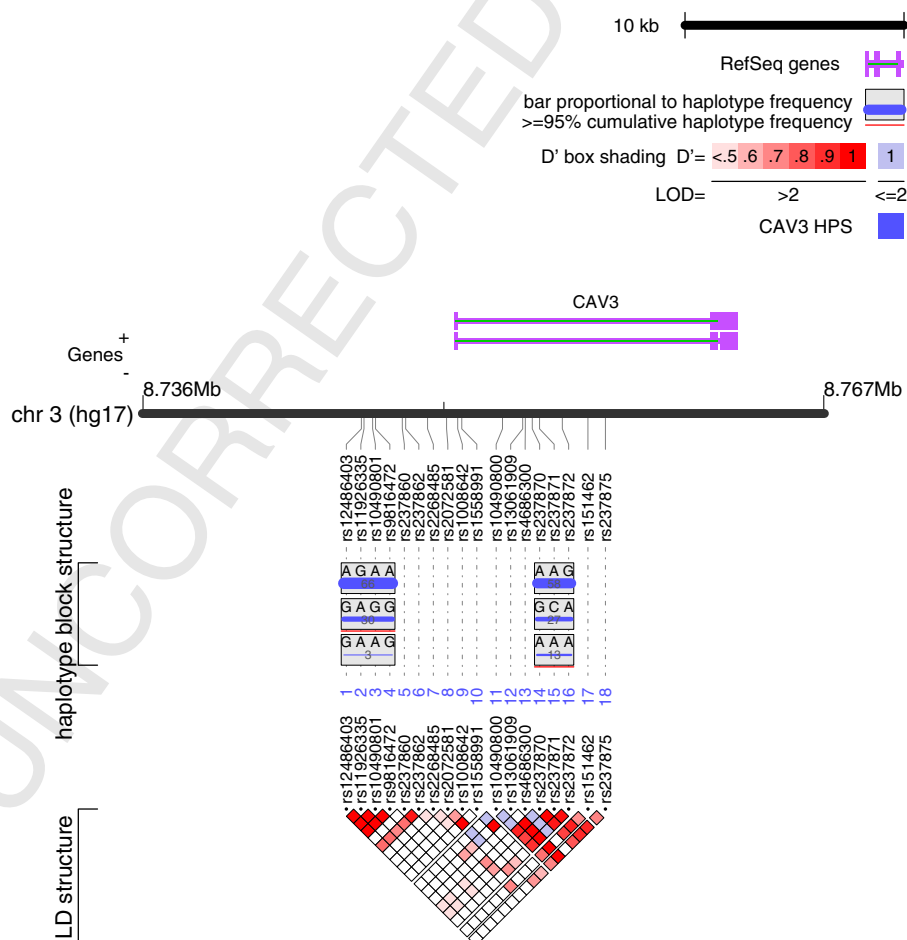

**Supplementary Figures 1 and 2.** Linkage disequilibrium structure of genes associated with hepatopulmonary syndrome. Pair-wise linkage disequilibrium (*LD*) between loci (*D'* and *r*<sup>2</sup>) and haplotype structure were measured using Haploview 4.0.<sup>11</sup> Here, LD was measured using all SNPs genotyped in the controls in this study. The strength of LD is depicted graphically for each pair-wise comparison (*squares*), such that *white* and *blue* represent low levels of LD, and *red* indicates high levels of LD (see color key). The SNPs are identified by their RS numbers and displayed relative to the candidate gene region. The display range of the chromosome (*black line*) corresponds to the genomic region of the candidate gene (roughly coding sequence  $\pm$  5–10 kilobases) targeted by this study. Exon/intron structure of the genes is indicated by *thick/thin purple lines* according to genome assembly hg17/May 2004. Annotated graphical images were generated using LocusView 2.0.<sup>20</sup>

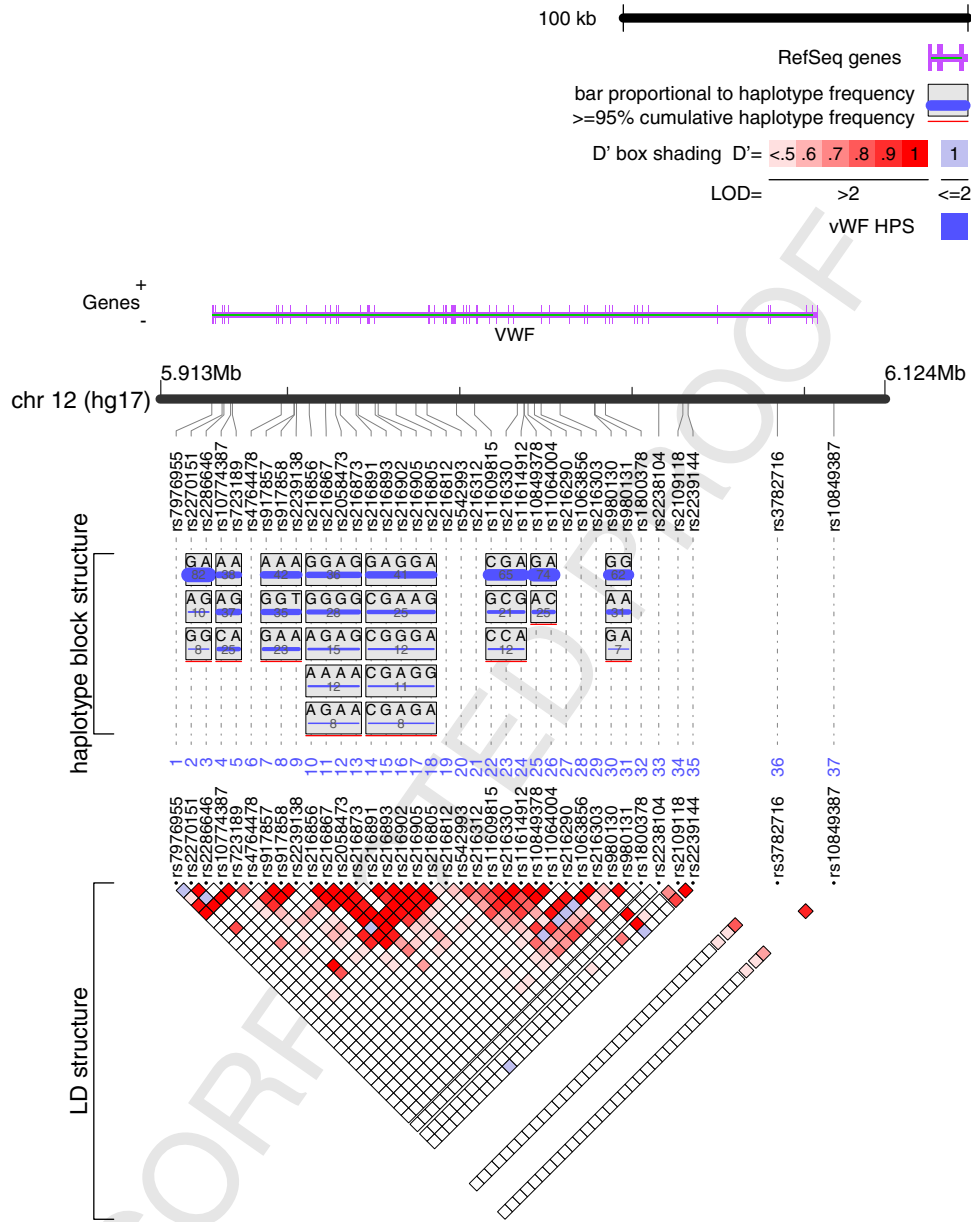

1850  
1851  
1852  
1853  
1854  
1855  
1856  
1857  
1858  
1859  
1860  
1861  
1862  
1863  
1864  
1865  
1866  
1867  
1868  
1869  
1870  
1871  
1872  
1873  
1874  
1875  
1876  
1877  
1878  
1879  
1880  
1881  
1882  
1883  
1884  
1885  
1886  
1887  
1888  
1889  
1890  
1891  
1892  
1893  
1894  
1895  
1896  
1897  
1898  
1899  
1900  
1901  
1902  
1903  
1904  
1905

1850  
1851  
1852  
1853  
1854  
1855  
1856  
1857  
1858  
1859  
1860  
1861  
1862  
1863  
1864  
1865  
1866  
1867  
1868  
1869  
1870  
1871  
1872  
1873  
1874  
1875  
1876  
1877  
1878  
1879  
1880  
1881  
1882  
1883  
1884  
1885  
1886  
1887  
1888  
1889  
1890  
1891  
1892  
1893  
1894  
1895  
1896  
1897  
1898  
1899  
1900  
1901  
1902  
1903  
1904  
1905
